# Supplementary material for: Metabolic Coevolution in the Bacterial Symbiosis of Whiteflies and Related Plant Sap-Feeding Insects
Source: Oxford University Press journal article supplement (doi:10.1093/gbe/evv170), 2015-09-01
Supplement: evv170_Supplementary_Data.zip [file evv170_Supplementary_Data.zip]

A

(1)

|                                                 |                                                                                                      |     |
|-------------------------------------------------|------------------------------------------------------------------------------------------------------|-----|
| <i>B. tabaci</i> MEAM1 ArgG                     | MSGDQIKKIVLAYSGGLDTSSIIIPWLKENYNCEVVAFAVDIGQDRADLDGVEKKALQSGASECHVVDLREEIRDVYPTLQTGALYEETYLIGTSMARP  | 100 |
| <i>Ca. Portiera aleyrodidarum</i> BT-B-HRs ArgG | MS----KRVILAYSGGEEKSVIANWLQCNRYGEIITFTADLGQFKKIELAYKKAKVLGKIKMYIEDLKESFVTKMICHFRFRANTIIECGKKIGASIVRE | 96  |
| <i>B. tabaci</i> Asia II 3 ArgG                 | MSGDKIKKIVLAYSGGLDTSSIIIPWLKENYNCEVVAFAVDIGOERADLDG-----                                             | 50  |
| <i>B. tabaci</i> MEAM1 ArgG                     | ITAKAQVELALRLGADAVAHGATGKGNDUVRFEFTAFATAPOLKVVAPWREWDLRSKEALLNYLKERNIH-TTATLEKI-TSRDENAWHISTEGGELEDF | 198 |
| <i>Ca. Portiera aleyrodidarum</i> BT-B-HRs ArgG | LIILRLIEIAKLNKTTNISYGTIKKSKDLIRLLDSTYSINFIKIIAPWRDLNFISONKERTVFKKKFSNEFVQKHISCVNNDFLIHFSKCCCLDNT     | 196 |
| <i>B. tabaci</i> Asia II 3 ArgG                 | -----LALRLGADAVAHGATGKGNDUVRFEFTAFATAPOLKVVAPWREWDLRSKEALLNYLKERNIH-TTATLEKI-TSRDENAWHISTEGGELEDF    | 140 |
| <i>B. tabaci</i> MEAM1 ArgG                     | ANAPNKAANVWTVDPDAPDKPETVTIAIEKGRIVGVNGEKLTFYGLLEKLNALGAKHGVRIDIVENRIIVIKSRGCYETPGGTLMMTALRALEQLVLL   | 298 |
| <i>Ca. Portiera aleyrodidarum</i> BT-B-HRs ArgG | WNEAKKRCCLNSNFFKNTPDKFTYDITDFKQGNPTSINSEVLKSHEIMIKLNNLGSKHGIGRVNKRYYGSG-----LKA                      | 271 |
| <i>B. tabaci</i> Asia II 3 ArgG                 | ANAPNKAANVWTVDPDAPDKPETVTIAIEKGRIVGVNGEKLSEFACLEKLNALGAKHGVRIDIVENRI-----LVLD                        | 214 |
| <i>B. tabaci</i> MEAM1 ArgG                     | RDCYKWKQQLGHEMAVYVVDGKWFAPLTKSILAAAFSLAEVVDGEVVLQLYKGRATAIKKTSFKSLYSEEFATFGGEDEVYDHSAGGPIR--LFSLSARI | 396 |
| <i>Ca. Portiera aleyrodidarum</i> BT-B-HRs ArgG | RCCY---ENPGVTILHAHRAIESFTLDHEILQIKD-----ILMPLIA-----ENVYTVNLWTKIKMLKALIDTSQKYVNGIVIRIKLYKGV/VLI      | 353 |
| <i>B. tabaci</i> Asia II 3 ArgG                 | RDCYKWRQOLGHEMAVYVVDGKWFAPLTKSILAAAFSLAGGGGGEVVLQLYKGSATAIKKTSFKSLYSEEFATFGGEDEVYDHSAGGPIR--LFSLSARI | 312 |
| <i>B. tabaci</i> MEAM1 ArgG                     | RAIRDOKKILMRGRRQSSSRRLDATIRAPWMCELHTEKLKASWFLFPVTEACCAARRASPVLTGNSGGYNTKPKQISNSVFENLHSFFSFRKKIVLSFPQ | 496 |
| <i>Ca. Portiera aleyrodidarum</i> BT-B-HRs ArgG | IGTKSDQ-----                                                                                         | 360 |
| <i>B. tabaci</i> Asia II 3 ArgG                 | RAIRDOKK-----                                                                                        | 320 |
| <i>B. tabaci</i> MEAM1 ArgG                     | MNARKEAIFITAPGCNYSMSMDVRVAYRKIEGALTFLARDGMRMLRCALGLAVITLDSFSCSTENSLRCNVIRSFMGKPCETVVKNRLLRSSLRTPCLLI | 596 |
| <i>Ca. Portiera aleyrodidarum</i> BT-B-HRs ArgG | -----                                                                                                | 360 |
| <i>B. tabaci</i> Asia II 3 ArgG                 | -----                                                                                                | 320 |
| <i>B. tabaci</i> MEAM1 ArgG                     | LSHSFKWQIDRYIAKYATRLILRVWNPTVEVLCTKGSTRGSLERSPNLDSKPNENIFHARGKKCQNHCF                                | 664 |
| <i>Ca. Portiera aleyrodidarum</i> BT-B-HRs ArgG | -----                                                                                                | 360 |
| <i>B. tabaci</i> Asia II 3 ArgG                 | -----                                                                                                | 320 |

(2)

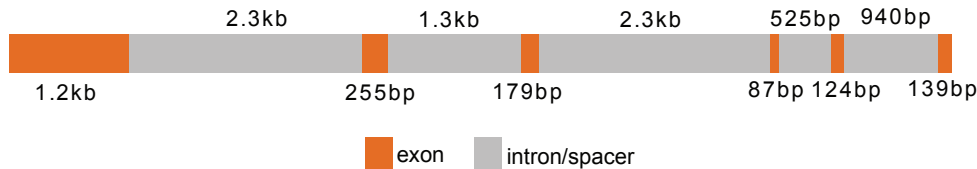

B

(1)

|                                           |                                                                                                        |     |
|-------------------------------------------|--------------------------------------------------------------------------------------------------------|-----|
| <i>B. tabaci</i> MEAM1 ArgH               | -----MHRFQMALWGSRFTEAADQRFKLFNLSLRFDYRLAEQDIIGSIAWSMALVTWNILTSOEQKELESALNTLLAEVNSHFEQIPQSD             | 85  |
| <i>Ca. Portiera aleyrodidarum</i> TV ArgH | -----MKNFKKFWIGRKKSTCKLVNFTASINFDYRLVYHDKVSIHAKMLEIVGLLTLLKESQLIINGKKNIEKDINNEKTINWFTK                 | 83  |
| <i>P. venusta</i> ASL-1                   | MSDTIEINKTVELNKSATDKTKLWNCQCEQDISFEFLQFNCSITEDEILYADDIEGSIHVTLMLSECQIIEQRRERQIVETLGNIKDDIEKGKVEL       | 99  |
| <i>P. venusta</i> ASL-2                   | -----MHSCGDLVKEEKKTIIINTLNETEGDINDNKIELKTE                                                             | 37  |
| <i>B. tabaci</i> MEAM1 ArgH               | AEDIHSWVESRLIEVVALGKKLHTGRSRNDQVITEPGVNVVSYGKETFFMIVNPMMLSCQVATDKLWCKAQVNDLLIATRGDQALITTTEATQDILMPG    | 185 |
| <i>Ca. Portiera aleyrodidarum</i> TV ArgH | LEDVHMNIENANLIKKIGNIGKKLHTGRSRNDQTS-----TDIIRLVLEKIDKTKLTKTKRSLNLNLAISESDTIMPG                         | 156 |
| <i>P. venusta</i> ASL-1                   | LEDIHMNIEAELINRIGDIGRKLHTGRSRNDQVI-----TDLRLIFTRKNIKIILELVSTISRLTQLADQYAHVMPG                          | 172 |
| <i>P. venusta</i> ASL-2                   | LEDIHMNIESELIKRIGDIGRKLHTGRSRNDQIV-----TDLRLYTRKHIDIIEILLLTMHMLDHSKHKHTIMPG                            | 110 |
| <i>B. tabaci</i> MEAM1 ArgH               | YTHLQRAQVFSFAHWCLAYVEMLARDETNRDITLKRLDMSPLGCGALAGTAYPIDNEQLAAWLGASATRNSLDTSVDRDYLILILSNAATGMVHLSRFA    | 285 |
| <i>Ca. Portiera aleyrodidarum</i> TV ArgH | FTHLQIAQPIITFGHHILAWHEMISRDRHERILECRKRINTPLGSAALAGTTPINRNIIKDLLGFDHITENSLDAVSDRDRDAIEFTSVSSILLMHLRMC   | 256 |
| <i>P. venusta</i> ASL-1                   | FTHFQFAQPIISVGHYLLAYACMEKRDVERFLECRKRVNPNPLGSAALAGTTHPINHLLTQLLHFDQPSSENSLDAISDRDIEFISDCSQTIMHLSRIS    | 272 |
| <i>P. venusta</i> ASL-2                   | FTHFQTAQPIISVGHYLLAYASMEKRDNRHLECRKRVTNPNPLGSAALAGTTHPINRYLTSKLLDFTDKPSNSLDSISDRDFVIEFISDCQTIMHLSRIS   | 210 |
| <i>B. tabaci</i> MEAM1 ArgH               | EDLIFFNTGEASFVELSDKVTSGSSIMPQKKNPDALELIRGKCGRVQCAITGMLTTLKALPLAYNKNQEDKEGLFDADVTLGCLQMAALVLDGIRVKK     | 385 |
| <i>Ca. Portiera aleyrodidarum</i> TV ArgH | EELIFWTSPLPDDFIELPDCCTGSSIMPQKKNPDIPELIRGKTGRIYGNLNLIVLMKSQPLAYNKNQEDKEPLFDTEFVINDNFINTIKFLKINP        | 356 |
| <i>P. venusta</i> ASL-1                   | EEFIIFMNPQDFVALPDSLLTGSSIMPQKKNPDMLELIRGKSGRIYGNLNLITIMKSQPLAYNKDFQCKQPLFDSIKTITMTLTADEILNNVQFN        | 372 |
| <i>P. venusta</i> ASL-2                   | EEFIIFMNPQDFVELTLESEFTLGSSIMPQKKNPVLELIRGKTGRIYANLINILTTMKCOTLAYNKDLOEDKIPLFDTVDNIMCLVAFGKLEKSIFNE     | 310 |
| <i>B. tabaci</i> MEAM1 ArgH               | PRCRHAEQSTANSTELADYLVAKGLPFREAHHLVGRVVEAQAQCVPLAAMSLQELKKESDVVEEDVYPVLELQSCLEKNCAGKGVAAHQAVALAEAK      | 485 |
| <i>Ca. Portiera aleyrodidarum</i> TV ArgH | KKMYLSALCNYSTATDFADYLVVRGVPFERDAHSIVGKVYVYGGITNQKNENEIYIEKLEEFSSNKIDEELEVLITLGESINTRNHIGGTAENOVRSALRAK | 456 |
| <i>P. venusta</i> ASL-1                   | TKX-----                                                                                               | 375 |
| <i>P. venusta</i> ASL-2                   | KQMYETAKGFISTDLADYLVKGLPFRTSHEIVGSIKKVCNEKHRTSPLSETELEKTHSYKDDIIDIDICENSRYKNHIGGTSPEQWKISVONFR         | 410 |
| <i>B. tabaci</i> MEAM1 ArgH               | ERIILKSEP-----                                                                                         | 493 |
| <i>Ca. Portiera aleyrodidarum</i> TV ArgH | KIKKILLG-----                                                                                          | 464 |
| <i>P. venusta</i> ASL-1                   | -----                                                                                                  | 375 |
| <i>P. venusta</i> ASL-2                   | FVILKIKTNKLEPKFSY                                                                                      | 426 |

(2)

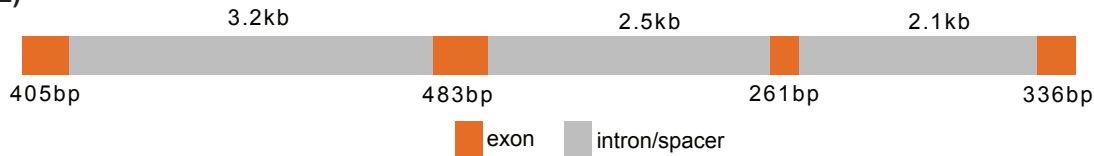

Fig. S2

C

(1)

|                                           |                                                                                                        |     |
|-------------------------------------------|--------------------------------------------------------------------------------------------------------|-----|
| <i>B. tabaci</i> MEAM1 DapF               | MAENAHQIRGRKLQIRIQRPKKHKMHNVRRSKFYHHTDRRKTAMMIGISIGSLTTYIGMAVGFVKSLAVDENHRPKSHS                        | 100 |
| <i>Ca. Portiera aleyrodidarum</i> TV DapF | -----MIIDFIN                                                                                           | 7   |
| <i>Ca. Hamiltonella defensa</i> DapF      | -----MCSLGNDFVIIDAVT                                                                                   | 15  |
| <i>Planococcus citri</i> DapF             | -----MLEKIDEVKMHGLGNDFVIIVKSEN                                                                         | 24  |
| <b>DAP epimerase</b>                      |                                                                                                        |     |
| <i>B. tabaci</i> MEAM1 DapF               | QNVSF--ADQIRRLADRLHGVGFDQLLVVERSPEDVDVDFHYRIFNVDSSEVAQCGNGARCFARFVQLQHLRKRDLHVSTASG-RRMVLSTTPDDQVRV    | 197 |
| <i>Ca. Portiera aleyrodidarum</i> TV DapF | QYFLIN--KTIHKYLSNRNLGVGFDQLLLVEIHNNHHFDFYRIFNANGSEVENCGNGARCLAKFLFDKRLTNKTIHIVETYGGHILLYININNNNLISV    | 105 |
| <i>Ca. Hamiltonella defensa</i> DapF      | QNVHLR--SEFICRLANRHTGIGFDQLLLLEFPNSPELDFHYRIFNADGSEVFCGNGARCLGRFVHLKGLTNKKNIQVSTKT--VKMQIHIEEKNQICV    | 111 |
| <i>Planococcus citri</i> DapF             | LLSSORNKOVAMEISNRRTGIGCDQFVWYEKIRTSYYNMT--LYNIDGSFVKICGNAARCLAKLISDETGEKEFTIKSTIKDLKCRINEHTVTVMGKV     | 122 |
| <i>B. tabaci</i> MEAM1 DapF               | NMGEPVLEERLIPFRTPPTNKTTETLYHMD----NVTFGCVSLGNPHCVVQVQSVKTAQVDTLGAMLETHERFPERTNVGFMVEVDPGHIHLRVFERGVG-E | 292 |
| <i>Ca. Portiera aleyrodidarum</i> TV DapF | NFGKP-LIKGFKIKTPISQ---FKLID-----LF-IVSIGNPHAVLIIVSNINTIPINILGNFIENNLFIETKINVGFMQIISPSLIKLRVFERGVGGE    | 194 |
| <i>Ca. Hamiltonella defensa</i> DapF      | NMGEPDFFPKTIPFRSKTIK--KIYELDVAEQKLLCGIVSMGNPHCIHQVEKLDSDQIKLIGPLLGCPSFPPEGTNVGFMQIIDRKHIHLRVYERAG-E    | 208 |
| <i>Planococcus citri</i> DapF             | SFOEP-WMPSMEKIRSVTEP--FAEDLS-----NLIDVDVANPHLVIFGIFTESNKL-LVGKKLONLEYELGVDNVSEVTIKD-NKIHVFIWFERGAG-P   | 210 |
| <b>DAP epimerase</b>                      |                                                                                                        |     |
| <i>B. tabaci</i> MEAM1 DapF               | TRACGSNACAAVCGVROGALA--SPVRVDLPGGTLRVTWAG-LGQPVYLTGPAVHVYDGFIDLGNK-                                    | 356 |
| <i>Ca. Portiera aleyrodidarum</i> TV DapF | TMACGTGACAAVSFGIKLGYLNRNKSIVKILPGGNLKINNLGGLYNSLYMSGYVKKVEDGSIEVFN--                                   | 260 |
| <i>Ca. Hamiltonella defensa</i> DapF      | TQACGSGACAAVSIGVQDILLD--EKVHVEQKGGNLDICIKG-TGHCLYMTGPADHVYDGVIHMSFKP                                   | 273 |
| <i>Planococcus citri</i> DapF             | TLACGSAACASFASSLKFGVLE--SPSEVIFTLGNISMSEON---GDLLMTGETTFVAEGKYYHYF--                                   | 271 |

(2)

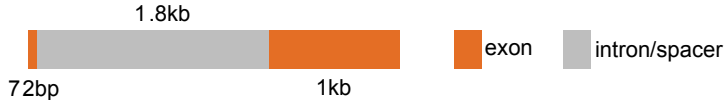

D

|                                           |                                                                                                       |     |
|-------------------------------------------|-------------------------------------------------------------------------------------------------------|-----|
| <i>B. tabaci</i> LysA                     | -----MAGIVPLSNHFTYRNNELYCEDIPVANLAEKYGTPLYVYSQAAILKQLOALQFAFSELK-P-LVCYSVKANSNLSILRLLAEHSGGF          | 85  |
| <i>Ca. Portiera aleyrodidarum</i> TV LysA | -----MTFQFYRG-ILFIENISCLKIAKKFGTPCYVYSKKEIHKYFNYYKYQLSLNHENICAYALKANSNIAILNLSQLGSGF                   | 79  |
| <i>Ca. Hamiltonella defensa</i> LysA-1    | MKSELFSPNVQVFQPQRLTPLLNDIEIRA-FIYTTPEKLTAYVKKYGSPLHLIWPENLQNLTALRTALQKLH-RHLIFYAVKVKKSQALLESAAKSGIGA  | 98  |
| <i>Ca. Hamiltonella defensa</i> LysA-2    | -----MREQNVKV                                                                                         | 8   |
| <i>B. tabaci</i> Asia II 3 LysA           | -----MAGIVPPWNHFTYRNNELYCEDIPVANLAEKYGTPLYVYSQAAILKQLOALQFAFSELK-P-LVCYSVKANSNLSILRLLAEHSGGF          | 85  |
| <i>B. tabaci</i> LysA                     | DVVS GGELKRV S----VAGGQARQTVFAGVGKTDDEIAAGLTAGVLMFNVESEELDAIVRVAQSKRIQAPVALRINPDVDPKTHRYISTGHKESKFGMD | 181 |
| <i>Ca. Portiera aleyrodidarum</i> TV LysA | DI V SIGELEKVL----IAGGDPKKIVYSGVAKKKQEIKRALKVGIKCFNVEFQEMDRINEIARLKNKANISIRINENVDAKTHPYISTGLKSNKFGIS  | 175 |
| <i>Ca. Hamiltonella defensa</i> LysA-1    | DVSSLYEMRAAR----KSGIPYSKICASGPSKTSIFLTDLITHDAC-ISIDSTEEFEI KALVAH--IQPAHRVRVLLRYRESFLPISRFGMKSKDLALC  | 191 |
| <i>Ca. Hamiltonella defensa</i> LysA-2    | DAVSLGEIERALKANFIPGESSDIIFTADLLDKMTLKKVIQLNIP-VNAGSIDMLEIQIGQAVSG---HPVWIRINPGFGHGHKKNTIGGENSKHGI-    | 102 |
| <i>B. tabaci</i> Asia II 3 LysA           | DVVS GGELKRV S----VAGGQARQTVFAGVGKTDDEIAAGLTAGVLMFNVESEELDAIVRVAQSKRIQAPVALRINPDVDPKTHRYISTGHKESKFGMD | 181 |
| <i>B. tabaci</i> LysA                     | IQRSLLAEKFKGSES-IKMIGIHMHIGSQITTTTAYSSAAAKSVDIITRLREMCHPTDFWNMGGGFGISYDGKTSPTS---ISEFA---AAVVPSTRK--  | 272 |
| <i>Ca. Portiera aleyrodidarum</i> TV LysA | IDKA-EEAYFYANSLTNIKVIGIDFHIGSQILNLNLFLEALDNIILLIKKLYKKIKILNILDIGGGLGVNYK-KINFYKFLIKKYF---TTL CERILANI | 270 |
| <i>Ca. Hamiltonella defensa</i> LysA-1    | LDKL--ASLKKQ----CHFLGFHFL-SGY-CKTRIEAIRELHPMITRAHSLGIKAQLMNIGGGLPVQYVDQHKYQTY-LKEHSPADYDHQKPPLSFY     | 281 |
| <i>Ca. Hamiltonella defensa</i> LysA-2    | WHEDLPKALEKIAQYQ-LKLIGFHMHIGSGV-NYQHLKKVCDAIVEQVIKLNQD---ISAISAGGGLSVPYKKGEKEVD--IEHYYNLWHRARKKISKHF  | 195 |
| <i>B. tabaci</i> Asia II 3 LysA           | IQRSLLAEKFKGSES-IKMIGIHMHIGSQITTTTAYSSAAAKSVDIITRLREMCHPTDFWNMGGGFGISYDGKTSPTS---ISEFA---AAVVPSTRK--  | 272 |
| <i>B. tabaci</i> LysA                     | -TGCRIVMEP--GRVIVGNAGILISRVIYTKVSGEKRFLIQDAAMNDLIRPSLYESFHGIWPKVP-AGFPSPPDDETSR-INGTKLCDVVGPFVCSGD    | 367 |
| <i>Ca. Portiera aleyrodidarum</i> TV LysA | -HNIEIILEP--GRSILANTGVLLTSVEIIKKTKIKNEAIVDAGMNDIFIRPAFYNAWHNIEV-----LINKVK-YYKKLFYDIVGPICESD          | 354 |
| <i>Ca. Hamiltonella defensa</i> LysA-1    | PYEGELNGAQWLSRLLLSHYKADFSLADYLNQKLTALALEPGRSIVDQCAITVR-VTRVKLLRRDRWVIFVEGSSSACETWFSSEF--LVDPIILAEQ    | 378 |
| <i>Ca. Hamiltonella defensa</i> LysA-2    | GHPVNIETEP--GRFLVAESGVLIQIRAIKNMGSQHYIIVDAGFNDLMRPAMYGSYHRISLL-----PADGRVSKK-HIKTV--VAGPICESGD        | 282 |
| <i>B. tabaci</i> Asia II 3 LysA           | -TGCRIVMEP--GRVIVGNAGILISRVIYTKVSGEKRFLIQDAAMNDLIRPSLYESFHGIWPKVP-AGFPSPPDDETSR-INGTKLCDVVGPFVCSGD    | 361 |
| <i>B. tabaci</i> LysA                     | FLAQD-----RAIPPLNRGELIAIFSAGAYGMT-MASNYNSRPRPAELLVNGSGVVVARR-RETDDLIAEELNPLS                          | 437 |
| <i>Ca. Portiera aleyrodidarum</i> TV LysA | FLGKK-----RYINKLSQNDLIVHSVGAYGFV-MSSNYNTRKRPSELLVDKNQFLIRE-SDSLKSLCKNEYVNLF                           | 424 |
| <i>Ca. Hamiltonella defensa</i> LysA-1    | KGPHRTCLSCQAFIAGHSCLDEDIISHRFIHPMLPQAGDFLVYSNTAGYQMDLLENRFHRHPIPHISLFDKQCA---                         | 454 |
| <i>Ca. Hamiltonella defensa</i> LysA-2    | VFTQNQNACLETVYPPAFVDDYIFHNTGAYGAS-MSSNYNSRPLIPEVLLKNGEVQLIRR-RQTIEELISLEIF---                         | 356 |
| <i>B. tabaci</i> Asia II 3 LysA           | -----                                                                                                 | 361 |

Fig. S2

E

(1)

|                                               |                                                                                                        |     |
|-----------------------------------------------|--------------------------------------------------------------------------------------------------------|-----|
| <i>B. tabaci</i> MEAM1 CM                     | -----MDCACASWIRNNVKVNIVIFEEVENRDLILNQKELST                                                             | 37  |
| <i>B. tabaci</i> Asia II 3 CM                 | -----                                                                                                  | 1   |
| <i>Ca. Hamiltonella defensa</i> CM            | -----                                                                                                  | 1   |
| <i>Ca. Portiera aleyrodidarum</i> BT-B-HRs CM | MNKKFKPYIKYIGNIDYOILKLISHRAKLVSQIOLADDKONCSYNNGHEDRYFYSIKTSNKGPLSNKVLISKIFKSIVSACLKEKKKSQVAYLGPEGTFTO  | 100 |
| <i>B. tabaci</i> MEAM1 CM                     | NSTWHKTGAKMGFIESALMVMVSLCLFV-----DVHPKSVAVCHPQTAEVCHPQTAEANAD---ASTGAMIILSLATTLNDRMEYMKIVAGDK          | 123 |
| <i>B. tabaci</i> Asia II 3 CM                 | -----MGFIESALMAMA-SLCLFV-----DVHKSVA-----VCHPQTAEVCHPOT---AD---TC-G-----RFD-----GN-                    | 50  |
| <i>Ca. Hamiltonella defensa</i> CM            | -----MSLIGINEIELLINQRFY-----YMEDIA-----AYKAEK-CLAIEDL---EQ---EK-----RIL-----RN-                        | 46  |
| <i>Ca. Portiera aleyrodidarum</i> BT-B-HRs CM | QAVLKVFCKSTKSTIPVKDVERTTENKIMNYGVVPVENSTEGIVNNTFDSFISSNLKIGGEIILSIHHHLLIDKONINKNIDKIYSHOOSFSOCRDLWLKNN | 200 |
| <i>B. tabaci</i> MEAM1 CM                     | YKKGKPVEDLPREKVMNSAVANASAEGLDPSNVRFPIQAQMDVAKDIQRTY--IAGWQVRPE-KWEPRALEEVR-EFTSADDAK-----ILRLSRQQL     | 213 |
| <i>B. tabaci</i> Asia II 3 CM                 | YD--HPVPG--RD-----AEQS-DGVHERRGAG--QAQMDVAKDIQRTY--IAGWQAR--EVGA-EGSRGGQGAADDAK-----ILRLSRQQL          | 121 |
| <i>Ca. Hamiltonella defensa</i> CM            | -----AMLL-----AEQK--GITPNSIGSFSSALIHAAKLIQCRY--QSDWQKKSITKHPQNLQAMRYKLLQLNDSL-----IERVYQALI            | 119 |
| <i>Ca. Portiera aleyrodidarum</i> BT-B-HRs CM | VPNAKKIAVASNAHASNLTOYKKNS-AAAGDLAASY-YSLLKLAKNTEDRINNYTRFLILSDKDVAFTGYDKTY-LMAYINNOIGSFYLLIEPFVRYNI    | 297 |
| <i>B. tabaci</i> MEAM1 CM                     | ELGGFCEAYRAQ---IYRSLTAPHITDAHRKLLVD-TLFCVTLKQ-----                                                     | 254 |
| <i>B. tabaci</i> Asia II 3 CM                 | TLGGFCEAYRAQ---IYRSLTAPYITDEHRKLLVD-TLFCVKLKQ-----                                                     | 162 |
| <i>Ca. Hamiltonella defensa</i> CM            | AGQKEKTTSGS---MIKMIHHPQLSETHKRKIIVT-ALQATHLIQ-----                                                     | 160 |
| <i>Ca. Portiera aleyrodidarum</i> BT-B-HRs CM | NILRLTTRPAPENKGVWNYIFLEUKGHRKSKLVEKTLLEETYRGAEKILGSFPEOLTTRI                                           | 359 |

(2)

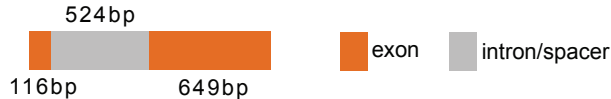

F

|                                          |                                                                                                          |     |
|------------------------------------------|----------------------------------------------------------------------------------------------------------|-----|
| <i>B. tabaci</i> MEAM1 BioA              | MNLAER--DRKI LWHPFTQERTAPFIPIAVKRAEGPTITLVDDRAYLDDLSSWWVNLHGHAHEKTAGATYEQSRLEHVIIFAGFTHEPAVTLCEKLRALLP   | 98  |
| <i>Cardinium endosymbiont</i> cBtQ1 BioA | MPLKER--DCKV LWHPFTQAKTAEPLIAIKRGYGSYLYDTDDKPYLDLISSWWVNLHGHAHEGIAKAIYAQSLTLEHVIIFAGFTHEPAVQLCEKLOPLLP   | 98  |
| <i>Ca. Hamiltonella defensa</i> BioA     | MNKDDLDFDRHF IWHPHYTRMIDPLPCYPVKSAAQGVELILTDGRRLIDGMSSWWAAIHGYNCRELNQALHQQIEKMSHVMFGGITHSPAIDLCRQLIALTP  | 100 |
| <i>Planococcus citri</i> BioA            | MSILEK--DRSI IWHPFETOEKTAAPPILITKGKDSYLYDDKNNKYLDLVSSWWVNIHGHANDETSNATYNOCRKLEHVIIFAGFTHEPAVTLCDLSLTSLLP | 98  |
| <i>B. tabaci</i> MEAM1 BioA              | QKLSKFFFSNDNGSTAVEVALKMSYQYWWNKDERDKTVFLSFEQAYHGDTFGAMSVG-VTSGFHDPTSRLLFFSVLTIPFFETWI--GDDQVERK-EIHALQ   | 194 |
| <i>Cardinium endosymbiont</i> cBtQ1 BioA | G-FSKFFFSNDNGSTAVEVALKMAQQYWHNQGVKRTIFLSFDGGYHGDTFGAMSIG-VKSGFHTLFSDLFFSVLTIPFPATWD--GDEATQNK-EAYALE     | 193 |
| <i>Ca. Hamiltonella defensa</i> BioA     | DPLDCVELADSGSVSVEVALKMALQYWHAKG-ERRSKILSFRQGYHGDTFGALSVCDPENSMQALYQGYVAKNLFAPAPPAYQFSEYFFDAPWNNEEIQ      | 199 |
| <i>Planococcus citri</i> BioA            | SPLRKFFFSNDNGSTAVEVAMKMSYQWKNQO-YHKPLEVAEDGGYHGDTWGVMSVS-VKSGFHDAFEKVVEPVLYAPFPDTWL--EDDKVDEK-EANSII     | 193 |
| <i>B. tabaci</i> MEAM1 BioA              | ILERHLQADAHKIAALILEPLVQGASGMRMCRPEFVSRAVNLAHQYGILIIIFDEIMTGFGRTGSYFALEQVNFVPDFICVSKGLTGGFLPLAITATTDRI    | 294 |
| <i>Cardinium endosymbiont</i> cBtQ1 BioA | VLASHLSTSCDAIVLVLEPLIQGANGMOMCRPAFVEQVHVLVRNYGILVIFDEVMTGFGRTGTIFYCFEQINIIIPDFICLAKGLTGGFLPLALTVTTEKV    | 293 |
| <i>Ca. Hamiltonella defensa</i> BioA     | AFSQIIEETNNTDIAAVILEPIVQAGGGMRIYHPAFLREVSALCERHQILLIADIEIATGFGRTGRLFACNYAAIAPDILCLGKALTGGYITLSATLCTREV   | 299 |
| <i>Planococcus citri</i> BioA            | VLROHLETNRNINSAIVLEPLVOGASGMRMCRASEIDKVTTLVREFDILVIFDEVMTGFGRTGTIFYFALDOTNAVPDFICLSKGIITGGFLPLSLTVTTOKI  | 293 |
| <i>B. tabaci</i> MEAM1 BioA              | YDAFLSEHNTKAFAGHGSYNTANPLGCAAGIASIELELTQPDIMAKLNRHILTHKKKELEKLSVAFTDIHRIKRVGTGTIAAFDI-PYAQL--LKPFLFKGLLL | 391 |
| <i>Cardinium endosymbiont</i> cBtQ1 BioA | YKVEWDDALNKSFAHGHGSYNTANPLGCAAAIASLDLLMEESTMQSIQAIHDAHTKAIVNLPVK----HR-RVTGTIAAFDL-ENPQT--FKRKCLEQGLLI   | 385 |
| <i>Ca. Hamiltonella defensa</i> BioA     | ANAISKKGAG-CFMHGPTFMANPLACAVANANLAILARHEWQPVKAIENQLWAEISPLSAI-----RASRYFGCTGVRRDRGD--RNEKSSRCGLIT        | 389 |
| <i>Planococcus citri</i> BioA            | YDSFLINDNEDKAFAGHGSYTGNEPVTCAAASVAFKILTDLKTKNNIASINTIHRNRINELKKNCKNVOHARITGTIAAFDVKENVOVKFKKEKCFEDGILI   | 393 |
| <i>B. tabaci</i> MEAM1 BioA              | RPLGNTITFLPPYCTSDLELEGAYKTVAETLRKSVGDNFGQGVN                                                             | 434 |
| <i>Cardinium endosymbiont</i> cBtQ1 BioA | RPLGNNAVYLLPPYSTTVSELEKAYEKTNNIIKII-----                                                                 | 419 |
| <i>Ca. Hamiltonella defensa</i> BioA     | T-----                                                                                                   | 390 |
| <i>Planococcus citri</i> BioA            | RPINRSVYVILPPYCTADEINVAVDVETIKCTNEE-----                                                                 | 427 |

Fig. S2

G

(1)

|                                      |                                                                                                        |     |
|--------------------------------------|--------------------------------------------------------------------------------------------------------|-----|
| <i>B. tabaci</i> MEAM1 BioB          | MALR--WSLEEA LRVFKLPADLMYQAQSTHRANFNPNEQISTLLSIKTGACPENCSCYCPQSAYYKTEIKKEPLMDLAEVVAAAKAAKEGGSTRFCMGA   | 98  |
| <i>Ca. Hamiltonella defensa</i> BioB | MPKQVTWTLQKQDAFFEQELLELLFTAQOIHRQHFDPQVQISTLLSIKTGACPENCCKYCPQSARMRTGLKSEKLMOVEQVLASARQAKAAGATRFMGA    | 100 |
| <i>Planococcus citri</i> BioB        | MSGK--WSVVQASKIFNLISLPFLFYKAQTVHRENFDAETIQISTLLSIKTGKCPENCSCYCPQSIHHKTNIKSEPLMDISKVIEAAKAAKANGSTRFCMGA | 98  |
| <i>B. tabaci</i> Asia II 3 BioB      | MALR--WSLEEA LRVFKLPADLMYQAQSTHRANFNPNEQISTLLSIKTGACPENCSCYCPQSAYYKTEIKKEPLMDLAEVVAAAKAAKEGGSTRFCMGA   | 98  |
| <i>B. tabaci</i> MEAM1 BioB          | AWRGPTDRNLPLVCDMVKEVKKLGLGETCVTLGLLKDRHAVQLKEAGLDFYNHNIDTSPEYYKKIISTRTFEDRIRTLHVNRNAGIKVCCGGILGMGENTE  | 198 |
| <i>Ca. Hamiltonella defensa</i> BioB | AWKNPHTRDMBYLEQMVKGVKAMGMETCMVLTGLTLDKTDADRLANAGLDYYNHNIDTSPEFYSSVITTRTYQERLDTLDEVROAGIKVCSGGIIGMGESPK | 200 |
| <i>Planococcus citri</i> BioB        | AWRGPTSKTLPQVCEMVKEVKKLGMETCVTLGLLKEEHAVALKDAGLDYYNHNIDTSPEYYEKIITTRTFENRIQTLHVNRNADIKVCCGGILGMGETTE   | 198 |
| <i>B. tabaci</i> Asia II 3 BioB      | AWRGPTDRNLPLVCDMVKEVKKLGLGETCVTLGLLKDRHAVQLKEAGLDFYNHNIDTSPEYYKKIISTRTFEDRIRTLHVNRNAGIKVCCGGILGMGENTE  | 198 |
| <i>B. tabaci</i> MEAM1 BioB          | DRIKMLLVLANLEPPESVPINOLIPIPGTPLADADPVEGTDVFRTIALTRVMMPKAYIRLSAGRENMSEEMQTLCLAGVNSIFYGEKLLTAKNFQPSK     | 298 |
| <i>Ca. Hamiltonella defensa</i> BioB | DRAGLLVQLANLSPPPESIPINMLVKVKGTFFEHKEDLDVDFIRTIIVARIIMPEASYVRLSAGREKNEQTQALCFMAGANSIFYGSKLLTTSNPSEDK    | 300 |
| <i>Planococcus citri</i> BioB        | DRIKMLLVLANLETPESVPINOLMKIPGTPLEDDVDIDPTEFVRTIGVARVMMPKSYIRLSAGRENMSEELQALCFMAGVNSIFYGEKLLTAKNFQPSK    | 298 |
| <i>B. tabaci</i> Asia II 3 BioB      | DRIKMLL-----GTDFVRTIALTRVMMPKAYIRLSAGRENMSEEMQTLCLAGVNSIFYGEKLLTAKNFQPSK                               | 266 |
| <i>B. tabaci</i> MEAM1 BioB          | DDQLLSKLGF-----KMEIDETPASSQCKEAAIG-----                                                                | 328 |
| <i>Ca. Hamiltonella defensa</i> BioB | DVQLFRQLGLNPQWTQVKTAPPEKIFVNLSENSSLFAQNQVEVEQKDEASSFFYNAAI                                             | 358 |
| <i>Planococcus citri</i> BioB        | DDILLDKLGY-----KASL-----ASA-----                                                                       | 316 |
| <i>B. tabaci</i> Asia II 3 BioB      | DDRLLSKLGF-----KMEIDETPANSQCKEAAIG-----                                                                | 296 |

(2)

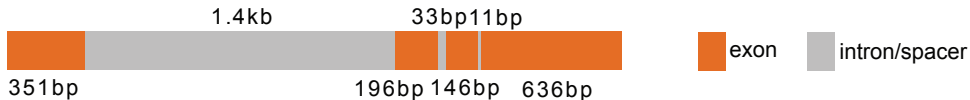

**Fig. S2**

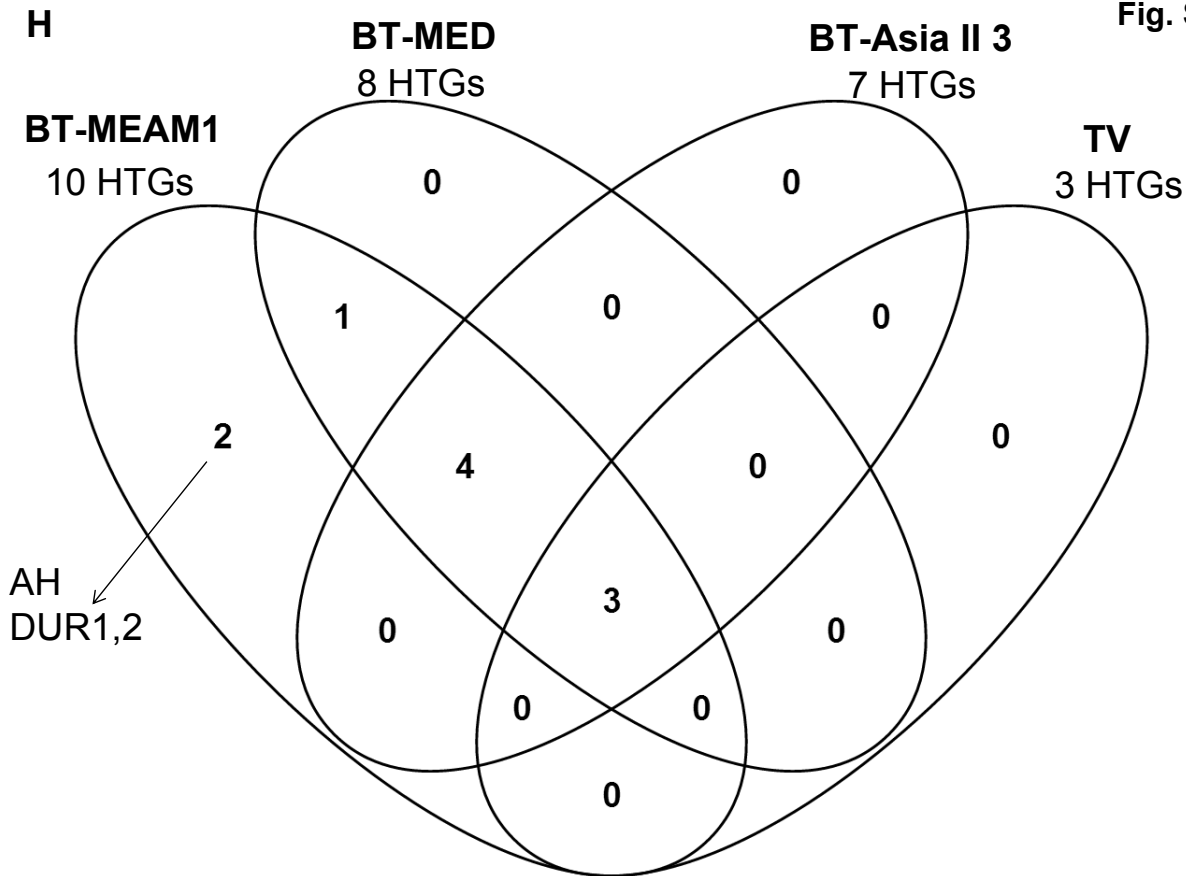



**A****Fig. S3**

# ArgG Gammaproteobacteria

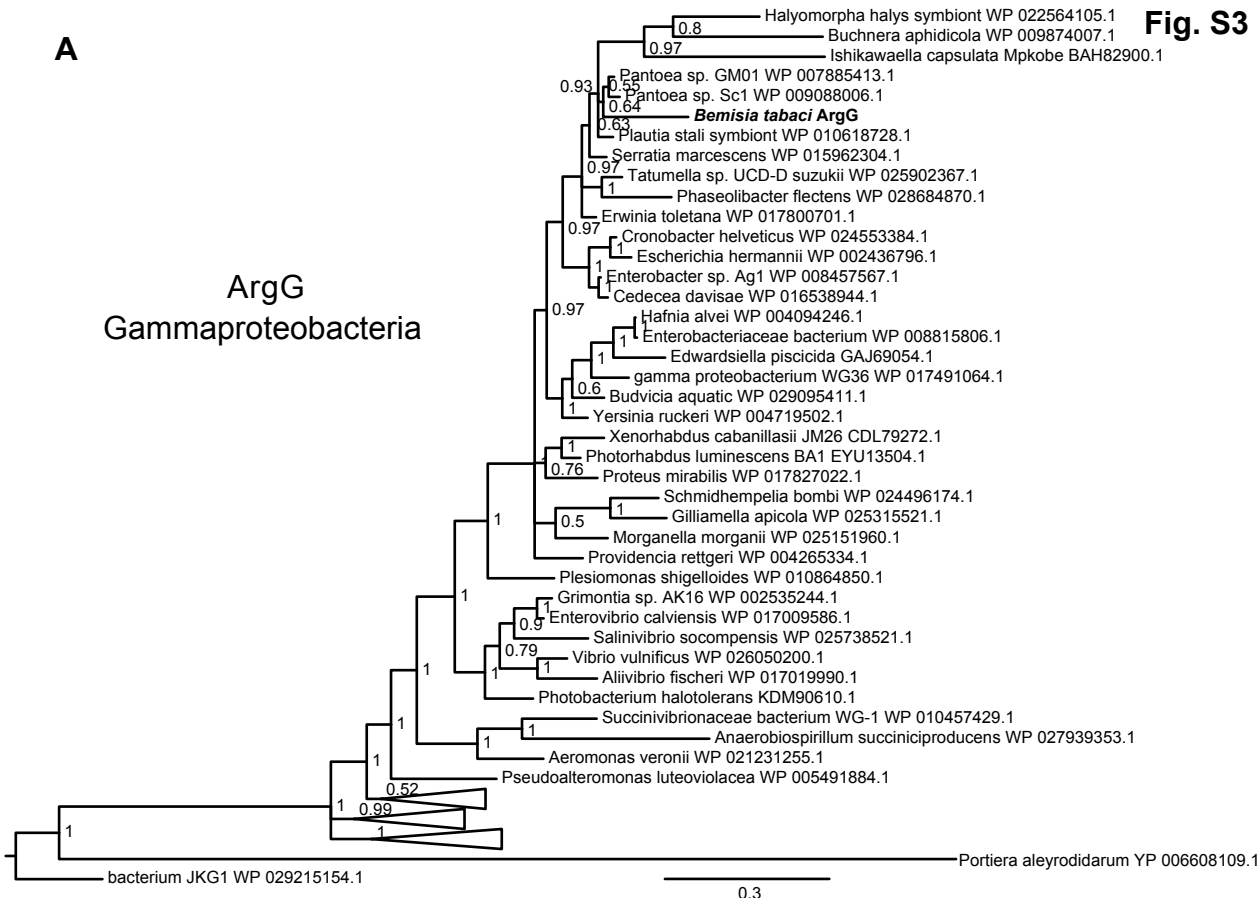

0.3

B

Fig. S3

# ArgH Gammaproteobacteria

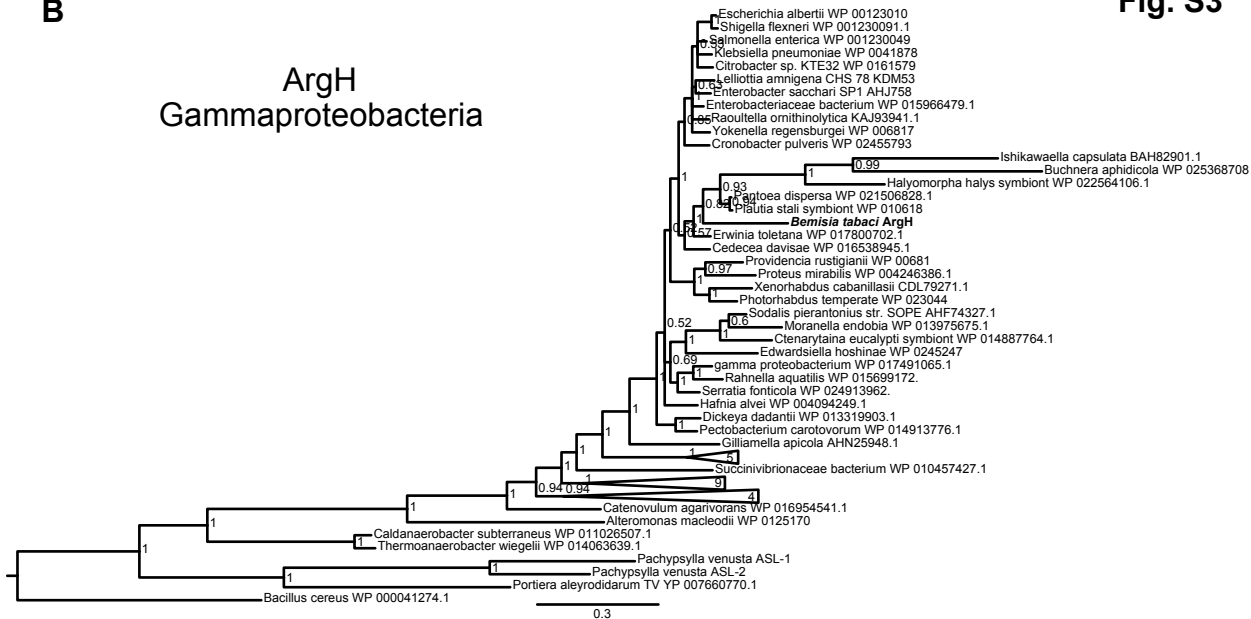

C

Fig. S3

DapB  
Alphaproteobacteria

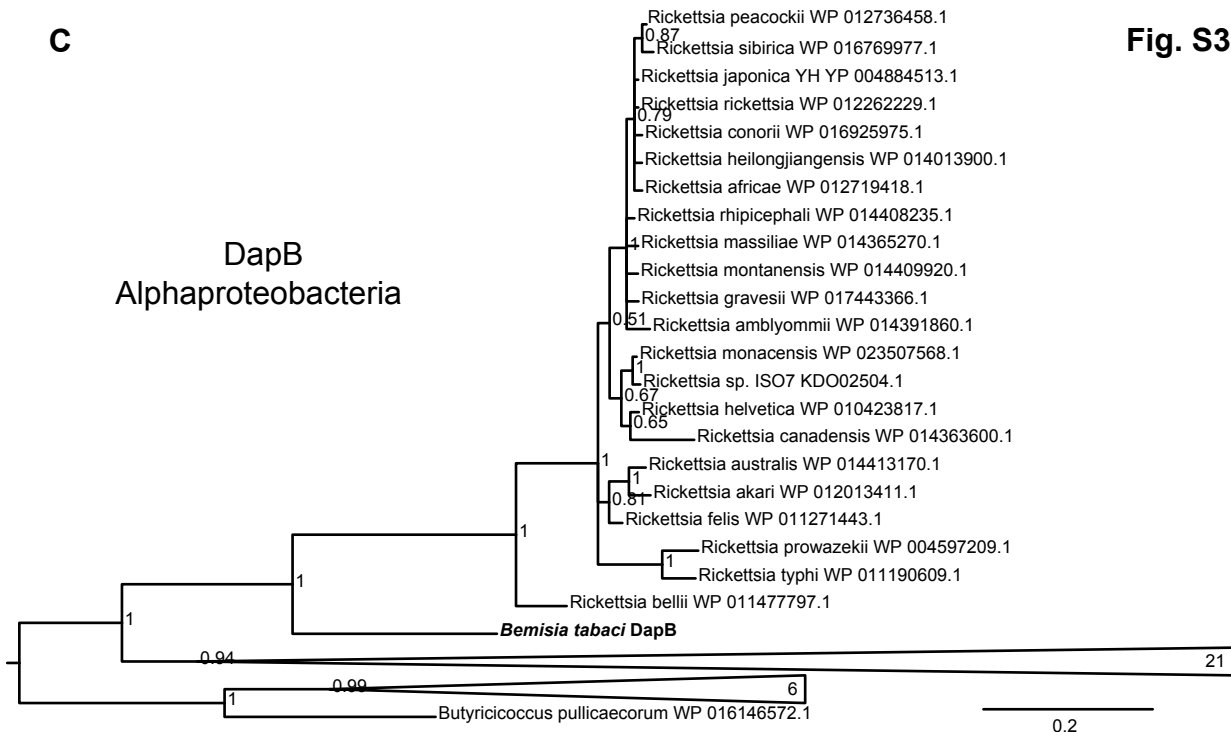

Fig. S3

D

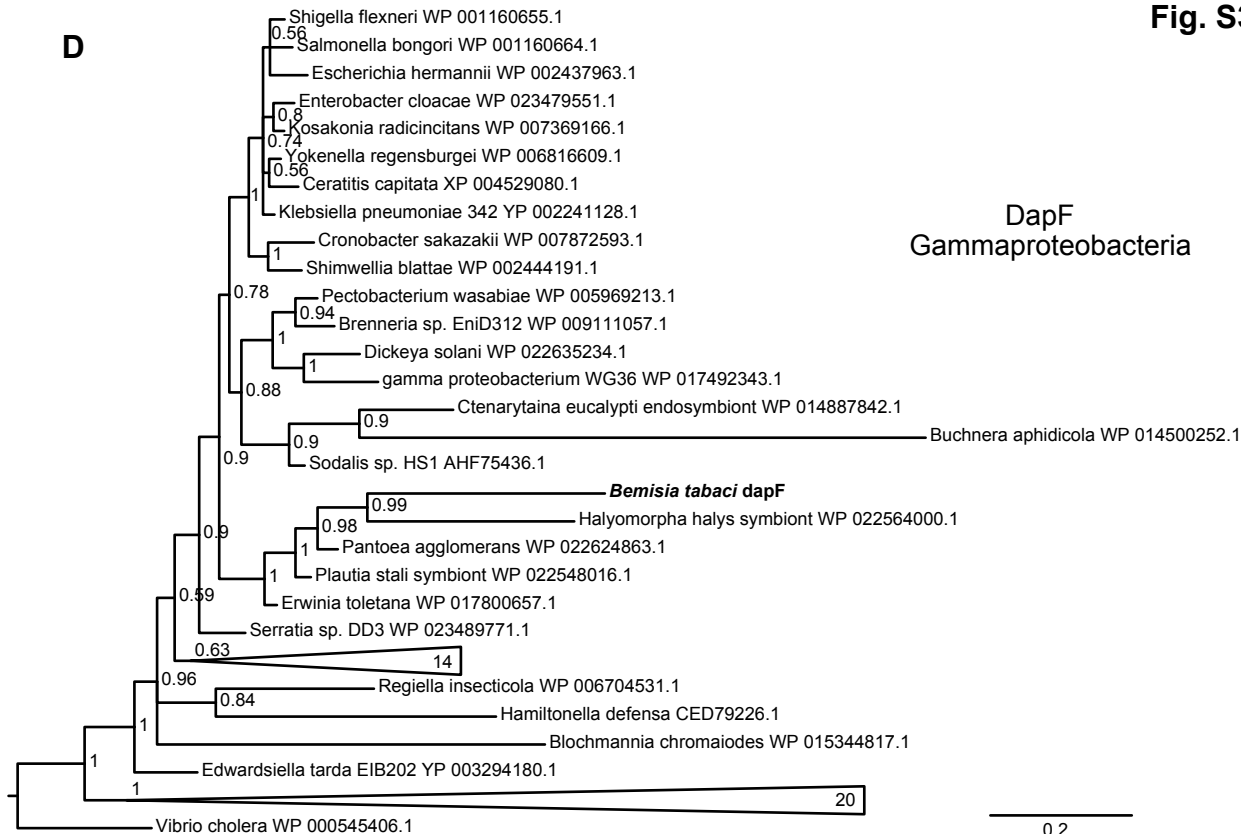

0.2

E

# LysA Planctomycetes

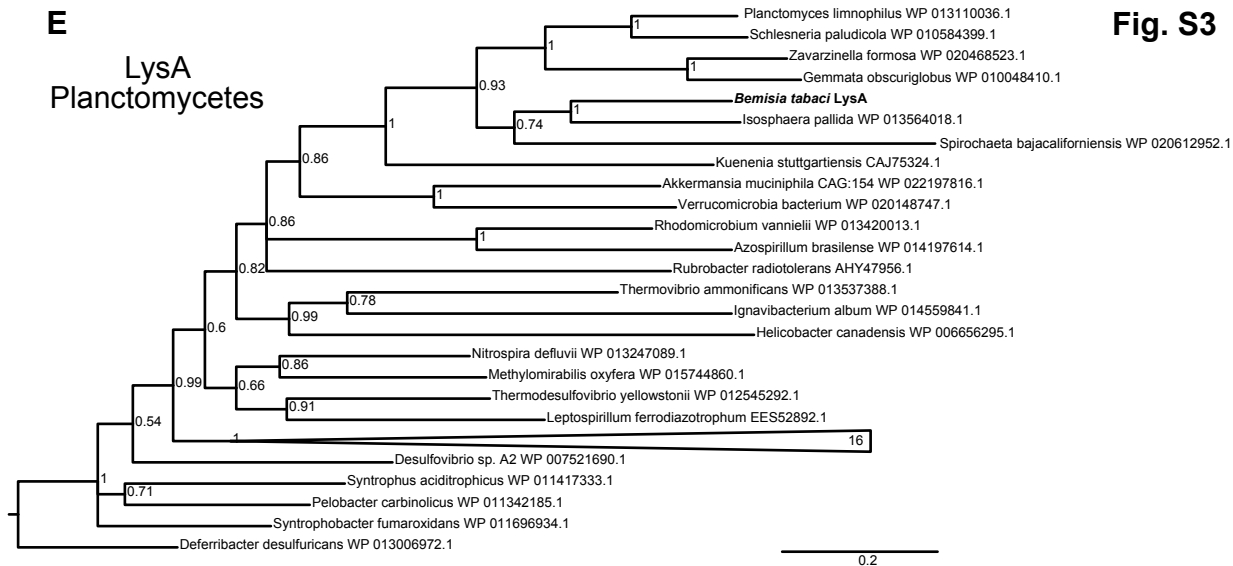

Fig. S3

Fig. S3

F

CM  
Gammaproteobacteria

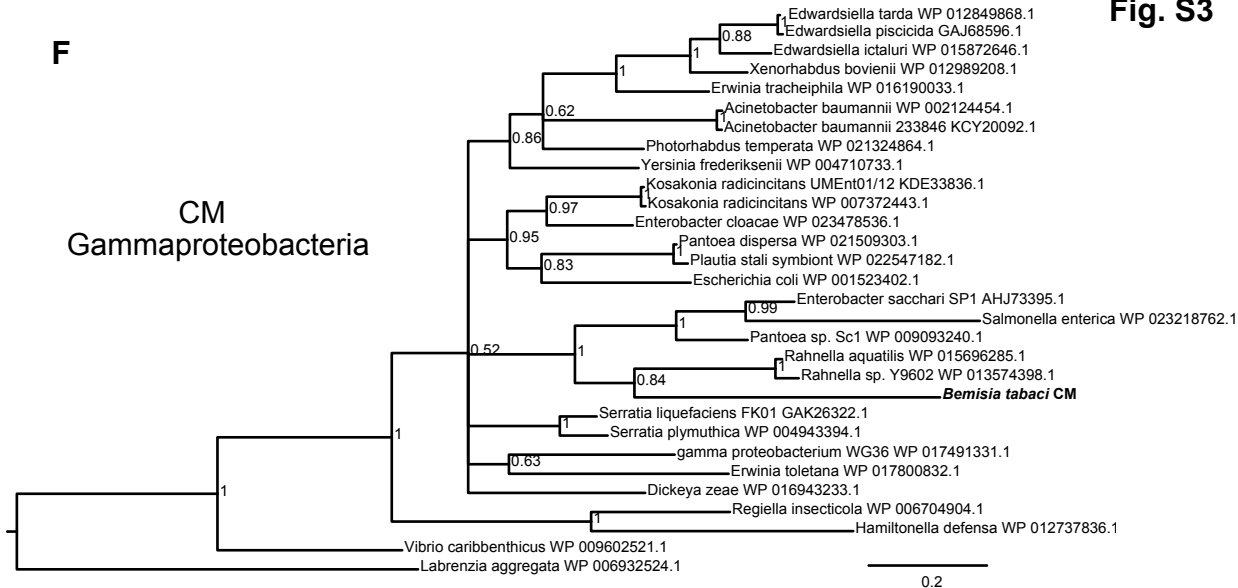

Fig. S3

G

BioA

Alphaproteobacteria  
or Bacteroidetes  
or  $\beta$ -proteobacteria

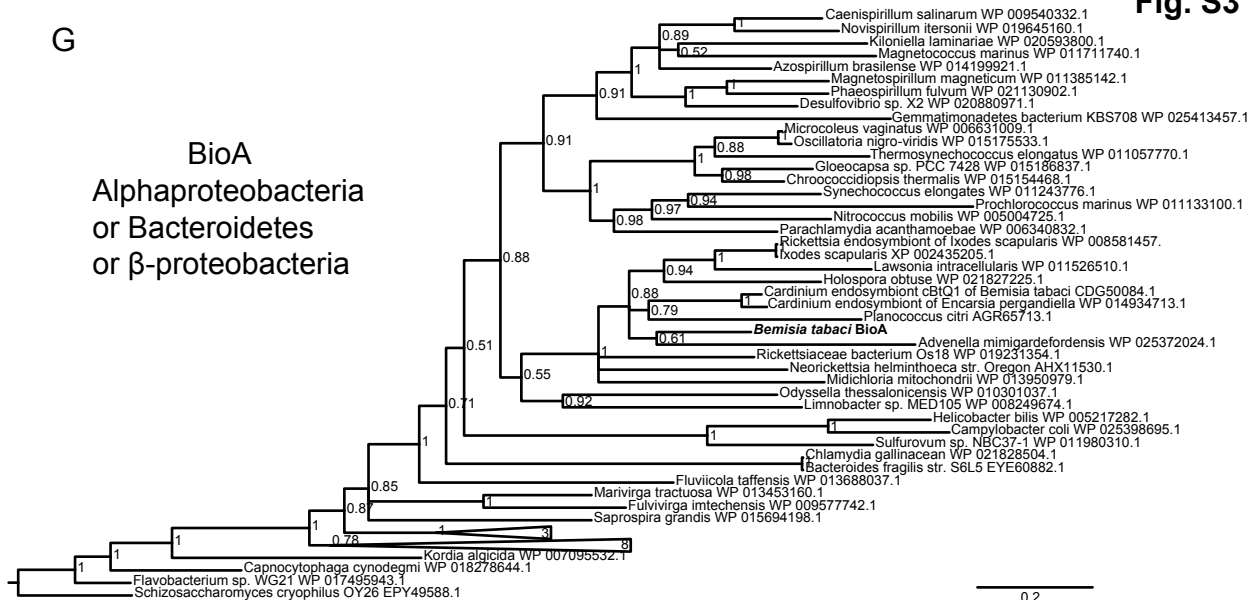

0.2

Fig. S3

H

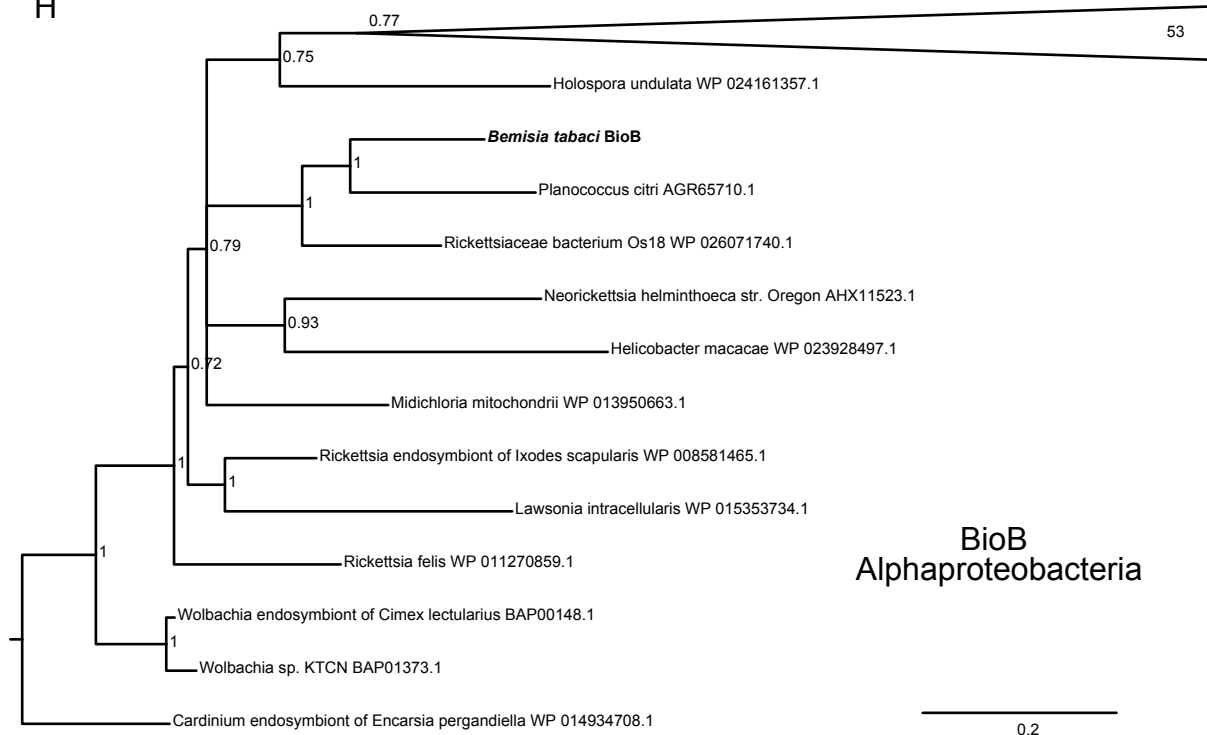



Fig. S3

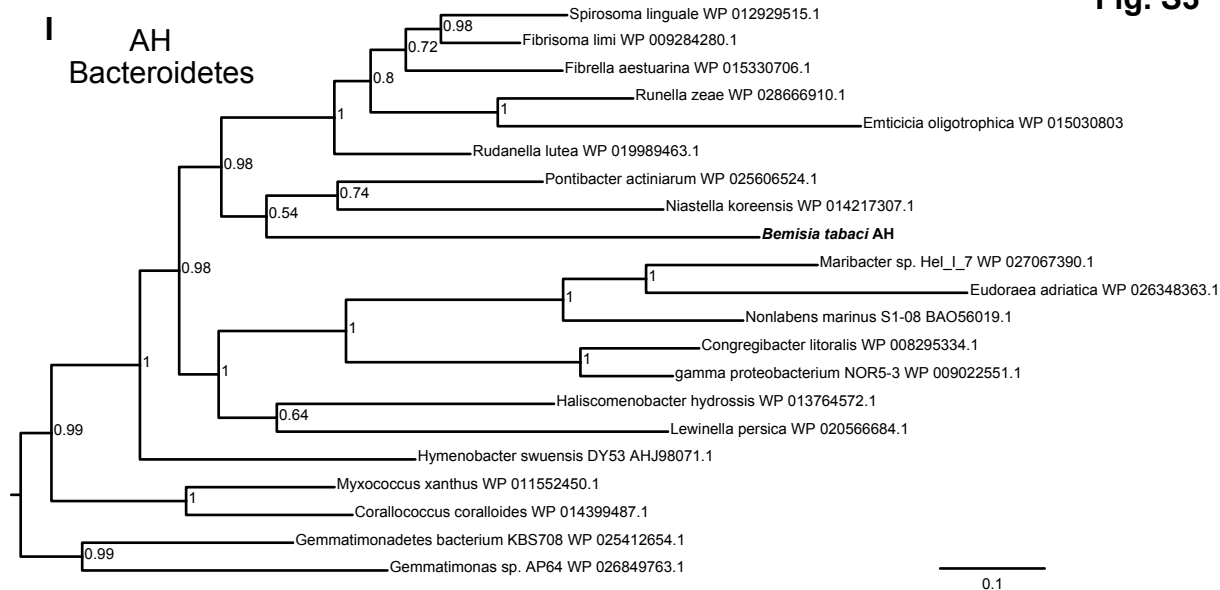

J

Fig. S3

DUR1,2  
Gammaproteobacteria

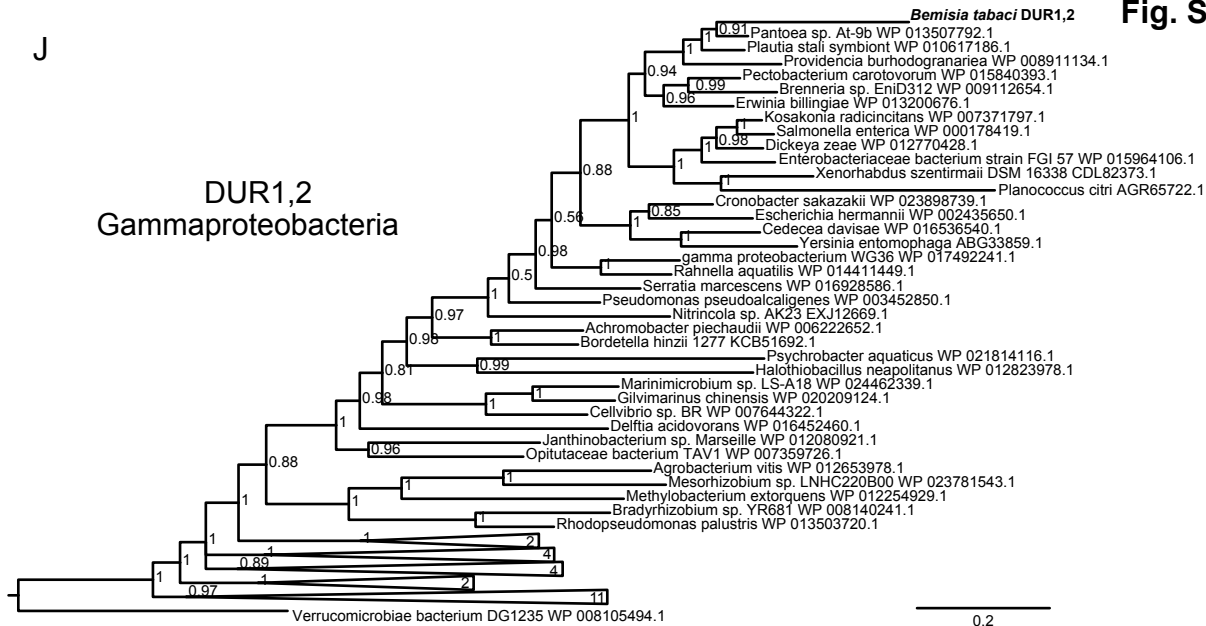

Fig. S4

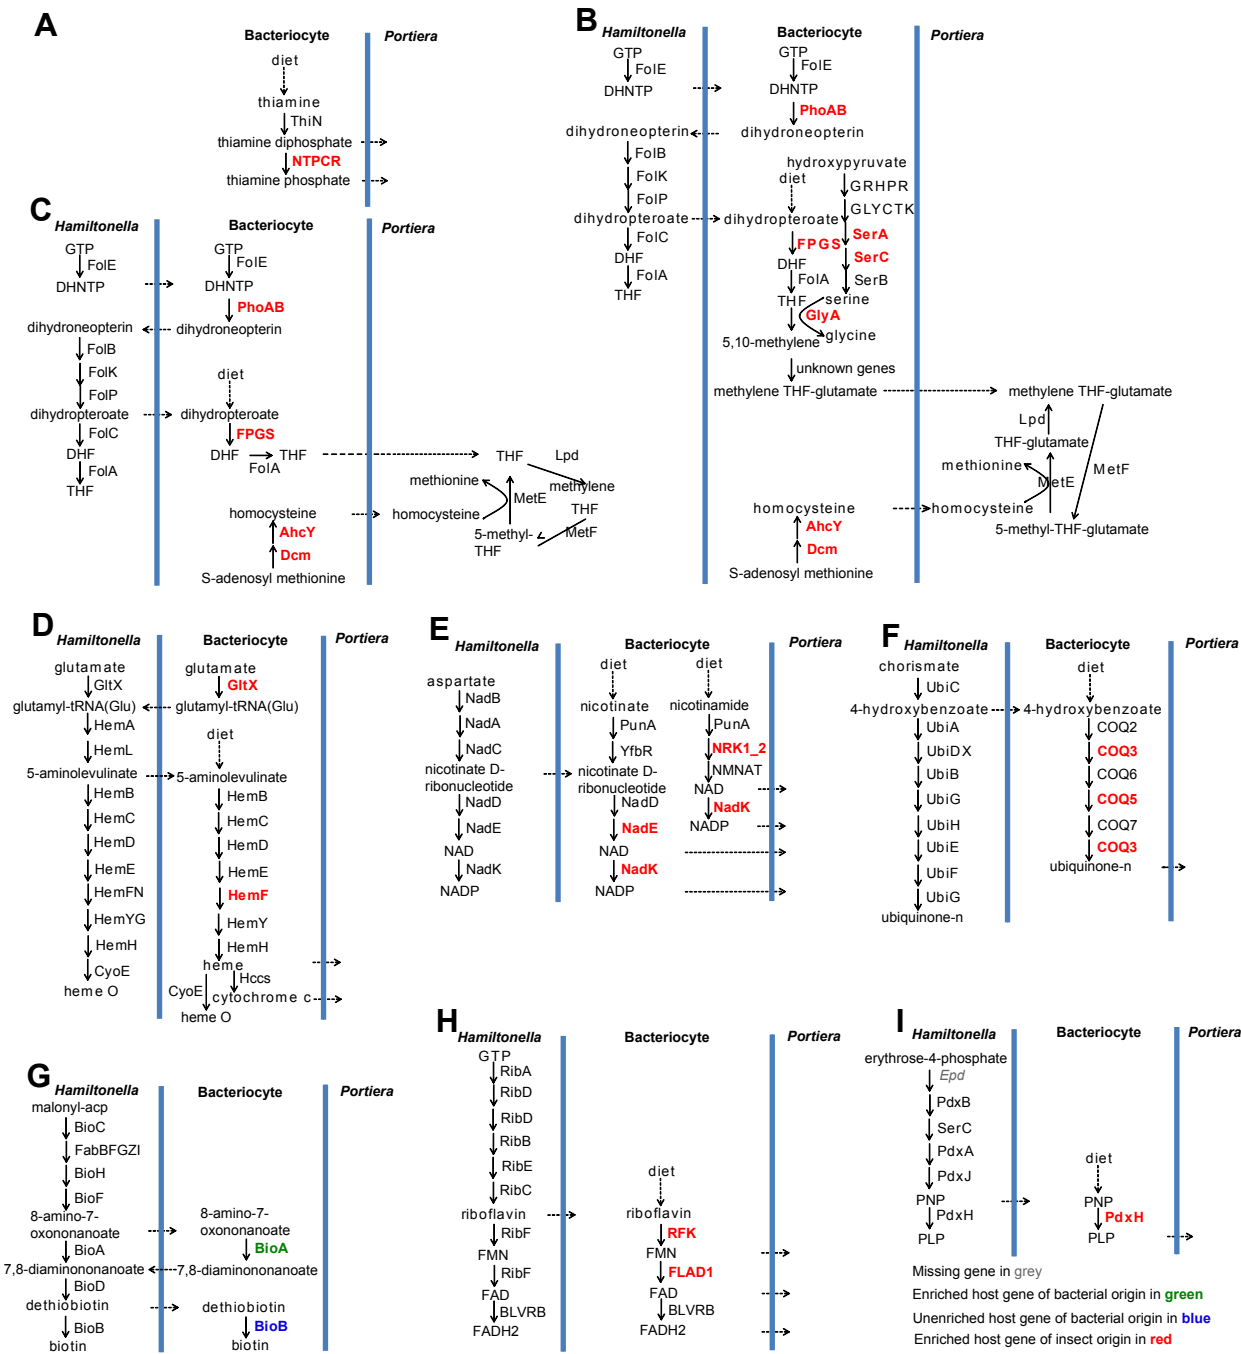

**Fig. S4**

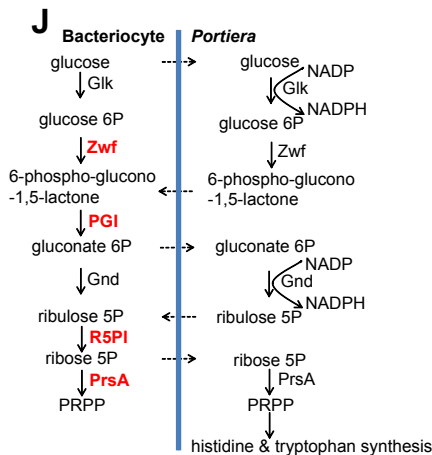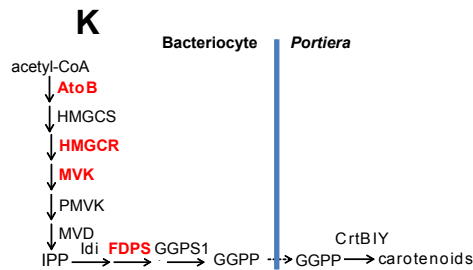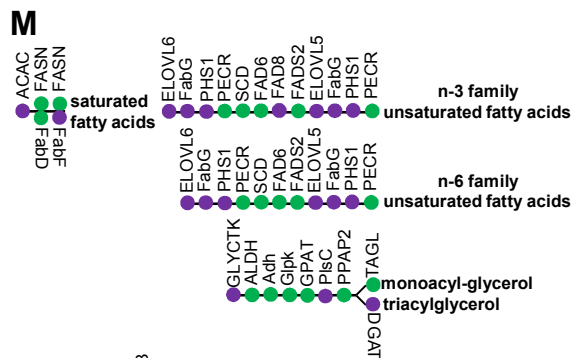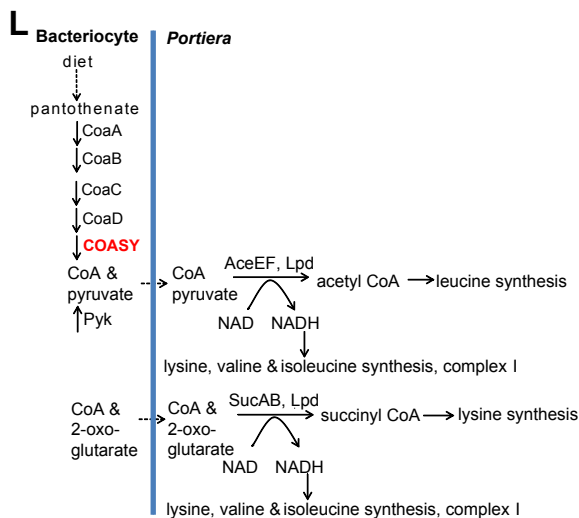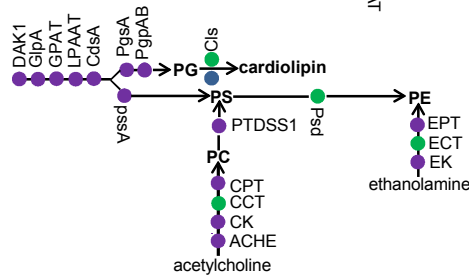

Portiera

Unenriched host gene of insect origin

Enriched host gene of insect origin in **red** or **green**
