# Supplementary material for: Metabolic Coevolution in the Bacterial Symbiosis of Whiteflies and Related Plant Sap-Feeding Insects
Source: Oxford University Press journal article supplement (doi:10.1093/gbe/evv170), 2015-09-01
Supplement: evv170_Supplementary_Data.zip [file evv170_Supplementary_Data.zip]

1

**B**

(2)

```
Portiera BT-B1 dapB MKIIIVLGSNGRIVKLLIKTKKDKNKLGVAVINPHKLLIGIDIGIIGLGNINIKFVGNINDVKNFDTIIDFTNPKITLQWLEYCSK----- 91
Portiera BT-B2 dapB MKIIIVLGSNGRIVKLLIKTKKDKNKLGVAVINPHKLLIGIDIGIIGLGNINIKFVGNINDVKNFDTIIDFTNPKITLQWLEYCSK----- 91
Portiera BT-Q1 dapB MKIIIVLGSNGRIVKLLIKTKKDKNKLGVAVINPHKLLIGIDIGIIGLGNINIKFVGNINDVKNFDTIIDFTNPKITLQWLEYCSK----- 91
Portiera BT-Q2 dapB MKIIIVLGSNGRIVKLLIKTKKDKNKLGVAVINPHKLLIGIDIGIIGLGNINIKFVGNINDVKNFDTIIDFTNPKITLQWLEYCSK----- 91
Portiera TV dapB MKIIIVLGSNGRIVKLLIKTKKDKNKLGVAVINPHKLLIGIDIGIIGLGNINIKFVGNINDVKNFDTIIDFTNPKITLQWLEYCSK----- 100

Portiera BT-B1 dapB ----- 108
Portiera BT-B2 dapB ----- 108
Portiera BT-Q1 dapB ----- 108
Portiera BT-Q2 dapB ----- 108
Portiera TV dapB GSNILKKIKLKNVPPVLSANMSIGANVILDIISITKKLIIKDFDIEIIEYHSKKIDYPSGTALNIGKKIARIIGYKLTIRVKNKTGPRIKNTI 200

Portiera BT-B1 dapB ----- 108
Portiera BT-B2 dapB ----- 108
Portiera BT-Q1 dapB ----- 108
Portiera BT-Q2 dapB ----- 108
Portiera TV dapB GYSIRAGDIIGEHKIIFASKSGEIELKHKVTNRLVFAYGALIAAKWIKNNNGFYNMQDVLKEENNFV 270
```

(3)

```
Portiera BT-B1 dapB MKIIIVLGSNGRIVKLLIKTKKDKNKLGVAVINPHKLLIGIDIGIIGLGNINIKFVGNINDVKNFDTIIDFTNPKITLQWLEYCSK----- 91
Portiera BT-B2 dapB MKIIIVLGSNGRIVKLLIKTKKDKNKLGVAVINPHKLLIGIDIGIIGLGNINIKFVGNINDVKNFDTIIDFTNPKITLQWLEYCSK----- 91
Portiera BT-Q1 dapB MKIIIVLGSNGRIVKLLIKTKKDKNKLGVAVINPHKLLIGIDIGIIGLGNINIKFVGNINDVKNFDTIIDFTNPKITLQWLEYCSK----- 91
Portiera BT-Q2 dapB MKIIIVLGSNGRIVKLLIKTKKDKNKLGVAVINPHKLLIGIDIGIIGLGNINIKFVGNINDVKNFDTIIDFTNPKITLQWLEYCSK----- 91
Portiera TV dapB MKIIIVLGSNGRIVKLLIKTKKDKNKLGVAVINPHKLLIGIDIGIIGLGNINIKFVGNINDVKNFDTIIDFTNPKITLQWLEYCSK----- 100

Portiera BT-B1 dapB ----- 154
Portiera BT-B2 dapB ----- 154
Portiera BT-Q1 dapB ----- 154
Portiera BT-Q2 dapB ----- 154
Portiera TV dapB GSNILKKIKLKNVPPVLSANMSIGANVILDIISITKKLIIKDFDIEIIEYHSKKIDYPSGTALNIGKKIARIIGYKLTIRVKNKTGPRIKNTI 200

Portiera BT-B1 dapB ----- 154
Portiera BT-B2 dapB ----- 154
Portiera BT-Q1 dapB ----- 154
Portiera BT-Q2 dapB ----- 154
Portiera TV dapB GYSIRAGDIIGEHKIIFASKSGEIELKHKVTNRLVFAYGALIAAKWIKNNNGFYNMQDVLKEENNFV 270
```

c

(1)

```
Portiera BT-B1 argG ATGCTAAAAAAGTAATCTTCGCTTATTCGGGAGGGGAGACAACATCGGTAATTCGCAACTGGTTACAATGCAATTATGGTTATGAATCATTACATTTA 100
Portiera BT-B2 argG ATGCTAAAAAAGTAATCTTCGCTTATTCGGGAGGGGAGACAACATCGGTAATTCGCAACTGGTTACAATGCAATTATGGTTATGAATCATTACATTTA 100
Portiera BT-Q1 argG ATGCTAAAAAAGTAATCTTCGCTTATTCGGGAGGGGAGACAACATCGGTAATTCGCAACTGGTTACAATGCAATTATGGTTATGAATCATTACATTTA 100
Portiera BT-Q2 argG ATGCTAAAAAAGTAATCTTCGCTTATTCGGGAGGGGAGACAACATCGGTAATTCGCAACTGGTTACAATGCAATTATGGTTATGAATCATTACATTTA 100
Portiera TV argG ATGCTAAAAAAGTAATCTTCGCTTATTCGGGAGGGGAGACAACATCGGTAATTCGCAACTGGTTACAATGCAATTATGGTTATGAATCATTACATTTA 100

Portiera BT-B1 argG CTGCTGACTTAGGCACAGAAAAAAGAGATTGAATTAGCTTACAAAAAGCAAAGATTAGGAATAAAAAAATGTATATAGAAGATTAAAAAGAAAG 200
Portiera BT-B2 argG CTGCTGACTTAGGCACAGAAAAAAGAGATTGAATTAGCTTACAAAAAGCAAAGATTAGGAATAAAAAAATGTATATAGAAGATTAAAAAGAAAG 200
Portiera BT-Q1 argG CTGCTGACTTAGGCACAGAAAAAAGAGATTGAATTAGCTTACAAAAAGCAAAGATTAGGAATAAAAAAATGTATATAGAAGATTAAAAAGAAAG 200
Portiera BT-Q2 argG CTGCTGACTTAGGCACAGAAAAAAGAGATTGAATTAGCTTACAAAAAGCAAAGATTAGGAATAAAAAAATGTATATAGAAGATTAAAAAGAAAG 200
Portiera TV argG CTGCTGACTTAGGCACAGAAAAAAGAGATTGAATTAGCTTACAAAAAGCAAAGATTAGGAATAAAAAAATGTATATAGAAGATTAAAAAGAAAG 200

Portiera BT-B1 argG TTTTGTAACAAAGTATATATGTCATAGGTTTAGAGCAAAATACAATTATGAATGTGGAAAAAATAAGTGTCATCAATAGTACGGCGGTTAATTATTAAG 300
Portiera BT-B2 argG TTTTGTAACAAAGTATATATGTCATAGGTTTAGAGCAAAATACAATTATGAATGTGGAAAAAATAAGTGTCATCAATAGTACGGCGGTTAATTATTAAG 300
Portiera BT-Q1 argG TTTTGTAACAAAGTATATATGTCATAGGTTTAGAGCAAAATACAATTATGAATGTGGAAAAAATAAGTGTCATCAATAGTACGGCGGTTAATTATTAAG 300
Portiera BT-Q2 argG TTTTGTAACAAAGTATATATGTCATAGGTTTAGAGCAAAATACAATTATGAATGTGGAAAAAATAAGTGTCATCAATAGTACGGCGGTTAATTATTAAG 300
Portiera TV argG TTTTGTAACAAAGTATATATGTCATAGGTTTAGAGCAAAATACAATTATGAATGTGGAAAAAATAAGTGTCATCAATAGTACGGCGGTTAATTATTAAG 300

Portiera BT-B1 argG AGGTTAATAAGAAATGCTTAATTAACAAAACCACTAATATTTTCATATGGAACCACTAAGAAGATGAAGATCTAATTAGATTAGACTTAAGTACGTATT 400
Portiera BT-B2 argG AGGTTAATAAGAAATGCTTAATTAACAAAACCACTAATATTTTCATATGGAACCACTAAGAAGATGAAGATCTAATTAGATTAGACTTAAGTACGTATT 400
Portiera BT-Q1 argG AGGTTAATAAGAAATGCTTAATTAACAAAACCACTAATATTTTCATATGGAACCACTAAGAAGATGAAGATCTAATTAGATTAGACTTAAGTACGTATT 400
Portiera BT-Q2 argG AGGTTAATAAGAAATGCTTAATTAACAAAACCACTAATATTTTCATATGGAACCACTAAGAAGATGAAGATCTAATTAGATTAGACTTAAGTACGTATT 400
Portiera TV argG AGGTTAATAAGAAATGCTTAATTAACAAAACCACTAATATTTTCATATGGAACCACTAAGAAGATGAAGATCTAATTAGATTAGACTTAAGTACGTATT 400

Portiera BT-B1 argG CATTAATCATATATATAAATAATGTCACCGTGGCGGTGATTGAATTTTCATCTCAAAACCACTAAGAAGATCTAATTAGATTAGACTTAAGTACGTATT 500
Portiera BT-B2 argG CATTAATCATATATATAAATAATGTCACCGTGGCGGTGATTGAATTTTCATCTCAAAACCACTAAGAAGATCTAATTAGATTAGACTTAAGTACGTATT 500
Portiera BT-Q1 argG CATTAATCATATATATAAATAATGTCACCGTGGCGGTGATTGAATTTTCATCTCAAAACCACTAAGAAGATCTAATTAGATTAGACTTAAGTACGTATT 500
Portiera BT-Q2 argG CATTAATCATATATATAAATAATGTCACCGTGGCGGTGATTGAATTTTCATCTCAAAACCACTAAGAAGATCTAATTAGATTAGACTTAAGTACGTATT 500
Portiera TV argG CATTAATCATATATATAAATAATGTCACCGTGGCGGTGATTGAATTTTCATCTCAAAACCACTAAGAAGATCTAATTAGATTAGACTTAAGTACGTATT 500

Portiera BT-B1 argG TGAATTTGTTCAAAAACATAAAAATCTTCGTCAGTGAATGATTCTTCATACATTTTTTCTAAATGTGGTGTGTAGATAACACATGGAATGAAGCC 600
Portiera BT-B2 argG TGAATTTGTTCAAAAACATAAAAATCTTCGTCAGTGAATGATTCTTCATACATTTTTTCTAAATGTGGTGTGTAGATAACACATGGAATGAAGCC 600
Portiera BT-Q1 argG TGAATTTGTTCAAAAACATAAAAATCTTCGTCAGTGAATGATTCTTCATACATTTTTTCTAAATGTGGTGTGTAGATAACACATGGAATGAAGCC 600
Portiera BT-Q2 argG TGAATTTGTTCAAAAACATAAAAATCTTCGTCAGTGAATGATTCTTCATACATTTTTTCTAAATGTGGTGTGTAGATAACACATGGAATGAAGCC 600
Portiera TV argG TGAATTTGTTCAAAAACATAAAAATCTTCGTCAGTGAATGATTCTTCATACATTTTTTCTAAATGTGGTGTGTAGATAACACATGGAATGAAGCC 600

Portiera BT-B1 argG AAAAAAAGAGTATTTTGAATTAATTTTTAAGAACCTCCCGATAAACCAACATATATAGACATACTTTTAAGCAAGGAATCCAATCTCAATAA 700
Portiera BT-B2 argG AAAAAAAGAGTATTTTGAATTAATTTTTAAGAACCTCCCGATAAACCAACATATATAGACATACTTTTAAGCAAGGAATCCAATCTCAATAA 700
Portiera BT-Q1 argG AAAAAAAGAGTATTTTGAATTAATTTTTAAGAACCTCCCGATAAACCAACATATATAGACATACTTTTAAGCAAGGAATCCAATCTCAATAA 700
Portiera BT-Q2 argG AAAAAAAGAGTATTTTGAATTAATTTTTAAGAACCTCCCGATAAACCAACATATATAGACATACTTTTAAGCAAGGAATCCAATCTCAATAA 700
Portiera TV argG AAAAAAAGAGTATTTTGAATTAATTTTTAAGAACCTCCCGATAAACCAACATATATAGACATACTTTTAAGCAAGGAATCCAATCTCAATAA 700

Portiera BT-B1 argG ATAGTGAAGTTTAAAAATCACATGAATAATGATTAACTAAATAATTTAGGTAGTAAACATGGGATTGGTAGAGTAAATAAAATAGATACAT-ATGGAT 799
Portiera BT-B2 argG ATAGTGAAGTTTAAAAATCACATGAATAATGATTAACTAAATAATTTAGGTAGTAAACATGGGATTGGTAGAGTAAATAAAATAGATACAT-ATGGAT 799
Portiera BT-Q1 argG ATAGTGAAGTTTAAAAATCACATGAATAATGATTAACTAAATAATTTAGGTAGTAAACATGGGATTGGTAGAGTAAATAAAATAGATACAT-ATGGAT 799
Portiera BT-Q2 argG ATAGTGAAGTTTAAAAATCACATGAATAATGATTAACTAAATAATTTAGGTAGTAAACATGGGATTGGTAGAGTAAATAAAATAGATACAT-ATGGAT 799
Portiera TV argG ATAGTGAAGTTTAAAAATCACATGAATAATGATTAACTAAATAATTTAGGTAGTAAACATGGGATTGGTAGAGTAAATAAAATAGATACAT-ATGGAT 800

Portiera BT-B1 argG CTGGATTAAAGGCAAGATGCTGTATGAAAAATCCAGGTGTAACTATTTTATATCATGCACATAGAGCAATAGAATCTTTTACTTTAGACCATGAATTTT 899
Portiera BT-B2 argG CTGGATTAAAGGCAAGATGCTGTATGAAAAATCCAGGTGTAACTATTTTATATCATGCACATAGAGCAATAGAATCTTTTACTTTAGACCATGAATTTT 899
Portiera BT-Q1 argG CTGGATTAAAGGCAAGATGCTGTATGAAAAATCCAGGTGTAACTATTTTATATCATGCACATAGAGCAATAGAATCTTTTACTTTAGACCATGAATTTT 899
Portiera BT-Q2 argG CTGGATTAAAGGCAAGATGCTGTATGAAAAATCCAGGTGTAACTATTTTATATCATGCACATAGAGCAATAGAATCTTTTACTTTAGACCATGAATTTT 899
Portiera TV argG CTGGATTAAAGGCAAGATGCTGTATGAAAAATCCAGGTGTAACTATTTTATATCATGCACATAGAGCAATAGAATCTTTTACTTTAGACCATGAATTTT 899

Portiera BT-B1 argG ACAAATAAAGAGATATTTTAAATGCGGTATATGCGAAAAAGTTTACACTGTAAATTTGTGGACAAAAGAAATAAAATGTTTAAAGCGTTAATTGATAC 999
Portiera BT-B2 argG ACAAATAAAGAGATATTTTAAATGCGGTATATGCGAAAAAGTTTACACTGTAAATTTGTGGACAAAAGAAATAAAATGTTTAAAGCGTTAATTGATAC 999
Portiera BT-Q1 argG ACAAATAAAGAGATATTTTAAATGCGGTATATGCGAAAAAGTTTACACTGTAAATTTGTGGACAAAAGAAATAAAATGTTTAAAGCGTTAATTGATAC 999
Portiera BT-Q2 argG ACAAATAAAGAGATATTTTAAATGCGGTATATGCGAAAAAGTTTACACTGTAAATTTGTGGACAAAAGAAATAAAATGTTTAAAGCGTTAATTGATAC 999
Portiera TV argG ACAAATAAAGAGATATTTTAAATGCGGTATATGCGAAAAAGTTTACACTGTAAATTTGTGGACAAAAGAAATAAAATGTTTAAAGCGTTAATTGATAC 999

Portiera BT-B1 argG TCTCAAAAATATGTAAACGGAATTTGTGAGATAAAATATACAAGGAATGTAGTAATATAGGCATAAAATCCGATCAATG----- 1083
Portiera BT-B2 argG TCTCAAAAATATGTAAACGGAATTTGTGAGATAAAATATACAAGGAATGTAGTAATATAGGCATAAAATCCGATCAATG----- 1083
Portiera BT-Q1 argG TCTCAAAAATATGTAAACGGAATTTGTGAGATAAAATATACAAGGAATGTAGTAATATAGGCATAAAATCCGATCAATG----- 1083
Portiera BT-Q2 argG TCTCAAAAATATGTAAACGGAATTTGTGAGATAAAATATACAAGGAATGTAGTAATATAGGCATAAAATCCGATCAATG----- 1083
Portiera TV argG TCTCAAAAATATGTAAACGGAATTTGTGAGATAAAATATACAAGGAATGTAGTAATATAGGCATAAAATCCGATCAATG----- 1099

Portiera BT-B1 argG ----- 1083
Portiera BT-B2 argG ----- 1083
Portiera BT-Q1 argG ----- 1083
Portiera BT-Q2 argG ----- 1083
Portiera TV argG ATGCTACATTGGAAGAGATCAAGGTATATATAACAAAAGATGCAGAAAGTTTATAAAATTAATCCATACGTTTAAAAATAGCATCAATTAACA 1199

Portiera BT-B1 argG ----- 1083
Portiera BT-B2 argG ----- 1083
Portiera BT-Q1 argG ----- 1083
```



(2)

```
Portiera BT-B1 argG MSKRVILAYSGGKQSVIANWLQCNYYEIIITFDLQGEKKKIELAYKRAKVLGIKKMYIEDLKESFVTKYICHRFRANTIIECGKKIGASIVRPLIIM 100
Portiera BT-B2 argG MSKRVILAYSGGKQSVIANWLQCNYYEIIITFDLQGEKKKIELAYKRAKVLGIKKMYIEDLKESFVTKYICHRFRANTIIECGKKIGASIVRPLIIM 100
Portiera BT-Q1 argG MSKRVILAYSGGKQSVIANWLQCNYYEIIITFDLQGEKKKIELAYKRAKVLGIKKMYIEDLKESFVTKYICHRFRANTIIECGKKIGASIVRPLIIM 100
Portiera BT-Q2 argG MSKRVILAYSGGKQSVIANWLQCNYYEIIITFDLQGEKKKIELAYKRAKVLGIKKMYIEDLKESFVTKYICHRFRANTIIECGKKIGASIVRPLIIM 100
Portiera TV argG MSKRVILAYSGGKQSVIANWLQCNYYEIIITFDLQGEKKKIELAYKRAKVLGIKKMYIEDLKESFVTKYICHRFRANTIIECGKKIGASIVRPLIIM 100

Portiera BT-B1 argG ALIEIAKLNKNTNISYGTTKSKDLIRLDLSTYSLNPYIKIIAPWRDLNLSQNKRLTYFKKKKFSNEFVQKHKISCVNNDFLHIFSCKGCLDNTWNEA 200
Portiera BT-B2 argG ALIEIAKLNKNTNISYGTTKSKDLIRLDLSTYSLNPYIKIIAPWRDLNLSQNKRLTYFKKKKFSNEFVQKHKISCVNNDFLHIFSCKGCLDNTWNEA 200
Portiera BT-Q1 argG ALIEIAKLNKNTNISYGTTKSKDLIRLDLSTYSLNPYIKIIAPWRDLNLSQNKRLTYFKKKKFSNEFVQKHKISCVNNDFLHIFSCKGCLDNTWNEA 200
Portiera BT-Q2 argG ALIEIAKLNKNTNISYGTTKSKDLIRLDLSTYSLNPYIKIIAPWRDLNLSQNKRLTYFKKKKFSNEFVQKHKISCVNNDFLHIFSCKGCLDNTWNEA 200
Portiera TV argG ALIEIAKLNKNTNISYGTTKSKDLIRLDLSTYSLNPYIKIIAPWRDLNLSQNKRLTYFKKKKFSNEFVQKHKISCVNNDFLHIFSCKGCLDNTWNEA 200

Portiera BT-B1 argG KKKKCLISNFFKNTDPKPTIIDITFKQGNPTSINSEVLKSHEIMIKLNNLGSKHGIGRVNKRIRYSGGLKARCCYENPGVTILYAHRAIESFTLDHEII 300
Portiera BT-B2 argG KKKKCLISNFFKNTDPKPTIIDITFKQGNPTSINSEVLKSHEIMIKLNNLGSKHGIGRVNKRIRYSGGLKARCCYENPGVTILYAHRAIESFTLDHEII 300
Portiera BT-Q1 argG KKKKCLISNFFKNTDPKPTIIDITFKQGNPTSINSEVLKSHEIMIKLNNLGSKHGIGRVNKRIRYSGGLKARCCYENPGVTILYAHRAIESFTLDHEII 300
Portiera BT-Q2 argG KKKKCLISNFFKNTDPKPTIIDITFKQGNPTSINSEVLKSHEIMIKLNNLGSKHGIGRVNKRIRYSGGLKARCCYENPGVTILYAHRAIESFTLDHEII 300
Portiera TV argG EONNRWNNITITPDSYIDITFNGSTIANRNYLPHNITIKLNNLGSKHGIGRVNKRIRYSGGLKARCCYENPGVTILYAHRAIESFTLDHEII 300

Portiera BT-B1 argG QIKDILMPLYAEKVYTVNLWTKIEIKMLKALIDTSQKYVNGIVRIKLYGNVVIIGIKSDQ----- 360
Portiera BT-B2 argG QIKDILMPLYAEKVYTVNLWTKIEIKMLKALIDTSQKYVNGIVRIKLYGNVVIIGIKSDQ----- 360
Portiera BT-Q1 argG QIKDILMPLYAEKVYTVNLWTKIEIKMLKALIDTSQKYVNGIVRIKLYGNVVIIGIKSDQ----- 360
Portiera BT-Q2 argG QIKDILMPLYAEKVYTVNLWTKIEIKMLKALIDTSQKYVNGIVRIKLYGNVVIIGIKSDQ----- 360
Portiera TV argG QIKDILMPLYAEKVYTVNLWTKIEIKMLKALIDTSQKYVNGIVRIKLYGNVVIIGIKSDQ----- 360
GKDIIMHVFASITNGVYNTFNRMKKIDTSQKYVNGIVRIKLYGNVVIIGIKSDQSLFNSSYATFEEDGQIYNQDAESFFKLKSLRLKIASIKQ 400

Portiera BT-B1 argG ----- 360
Portiera BT-B2 argG ----- 360
Portiera BT-Q1 argG ----- 360
Portiera BT-Q2 argG ----- 360
Portiera TV argG HIKCM 405
```

D

(1)

```
Portiera BT-B1 pheA ATGACACAAAAATTTAAACCCCTATATAAAATACATTGGTAATATTGACTATCAAAATTTAAAGTTAATTAGTCACCGTGCTA-----AATTGGTTT 91
Portiera BT-B2 pheA ATGACACAAAAATTTAAACCCCTATATAAAATACATTGGTAATATTGACTATCAAAATTTAAAGTTAATTAGTCACCGTGCTA-----AATTGGTTT 91
Portiera BT-Q1 pheA ATGACACAAAAATTTAAACCCCTATATAAAATACATTGGTAATATTGACTATCAAAATTTAAAGTTAATTAGTCACCGTGCTA-----AATTGGTTT 91
Portiera BT-Q2 pheA ATGACACAAAAATTTAAACCCCTATATAAAATACATTGGTAATATTGACTATCAAAATTTAAAGTTAATTAGTCACCGTGCTA-----AATTGGTTT 91
Portiera TV pheA ATGACACAAAAATTTAAACCCCTATATAAAATACATTGGTAATATTGACTATCAAAATTTAAAGTTAATTAGTCACCGTGCTA-----AATTGGTTT 91

Portiera BT-B1 pheA CACAAATTCAT-----GGCAGACGATAAACCAAAATTGTAGTTATAACAATGTCATGAAGACCGGATTTTATAGTATTAAACCAAGTAATAAGG 185
Portiera BT-B2 pheA CACAAATTCAT-----GGCAGACGATAAACCAAAATTGTAGTTATAACAATGTCATGAAGACCGGATTTTATAGTATTAAACCAAGTAATAAGG 185
Portiera BT-Q1 pheA CACAAATTCAT-----GGCAGACGATAAACCAAAATTGTAGTTATAACAATGTCATGAAGACCGGATTTTATAGTATTAAACCAAGTAATAAGG 185
Portiera BT-Q2 pheA CACAAATTCAT-----GGCAGACGATAAACCAAAATTGTAGTTATAACAATGTCATGAAGACCGGATTTTATAGTATTAAACCAAGTAATAAGG 185
Portiera TV pheA CACAAATTCAT-----GGCAGACGATAAACCAAAATTGTAGTTATAACAATGTCATGAAGACCGGATTTTATAGTATTAAACCAAGTAATAAGG 185

Portiera BT-B1 pheA ACCACTGCTCTAATAAGATTATCTAAATTTTAAATCTATTGATCGCGCTGTTTAAAGTTAAAAAAAAGTCAAGTAGCATATTAGTCCAGAG 285
Portiera BT-B2 pheA ACCACTGCTCTAATAAGATTATCTAAATTTTAAATCTATTGATCGCGCTGTTTAAAGTTAAAAAAAAGTCAAGTAGCATATTAGTCCAGAG 285
Portiera BT-Q1 pheA ACCACTGCTCTAATAAGATTATCTAAATTTTAAATCTATTGATCGCGCTGTTTAAAGTTAAAAAAAAGTCAAGTAGCATATTAGTCCAGAG 285
Portiera BT-Q2 pheA ACCACTGCTCTAATAAGATTATCTAAATTTTAAATCTATTGATCGCGCTGTTTAAAGTTAAAAAAAAGTCAAGTAGCATATTAGTCCAGAG 285
Portiera TV pheA ACCACTGCTCTAATAAGATTATCTAAATTTTAAATCTATTGATCGCGCTGTTTAAAGTTAAAAAAAAGTCAAGTAGCATATTAGTCCAGAG 285

Portiera BT-B1 pheA GCACATTTTACCCCAACAGCAGTATTAATAATTTTGGTAATCAATAAAAGTATACCGGTTAAAGATGCTTTAGACAATAGAAAAAATAATATA 385
Portiera BT-B2 pheA GCACATTTTACCCCAACAGCAGTATTAATAATTTTGGTAATCAATAAAAGTATACCGGTTAAAGATGCTTTAGACAATAGAAAAAATAATATA 385
Portiera BT-Q1 pheA GCACATTTTACCCCAACAGCAGTATTAATAATTTTGGTAATCAATAAAAGTATACCGGTTAAAGATGCTTTAGACAATAGAAAAAATAATATA 385
Portiera BT-Q2 pheA GCACATTTTACCCCAACAGCAGTATTAATAATTTTGGTAATCAATAAAAGTATACCGGTTAAAGATGCTTTAGACAATAGAAAAAATAATATA 385
Portiera TV pheA GCACATTTTACCCCAACAGCAGTATTAATAATTTTGGTAATCAATAAAAGTATACCGGTTAAAGATGCTTTAGACAATAGAAAAAATAATATA 385

Portiera BT-B1 pheA ATTATGGGGTGTACCAAGTAGAAAAATCAACAGAGGCGATAGTAATAACTTTTGATTCAATTATTAGTCAAACTAAAAATATGTTGGAATAAT 485
Portiera BT-B2 pheA ATTATGGGGTGTACCAAGTAGAAAAATCAACAGAGGCGATAGTAATAACTTTTGATTCAATTATTAGTCAAACTAAAAATATGTTGGAATAAT 485
Portiera BT-Q1 pheA ATTATGGGGTGTACCAAGTAGAAAAATCAACAGAGGCGATAGTAATAACTTTTGATTCAATTATTAGTCAAACTAAAAATATGTTGGAATAAT 485
Portiera BT-Q2 pheA ATTATGGGGTGTACCAAGTAGAAAAATCAACAGAGGCGATAGTAATAACTTTTGATTCAATTATTAGTCAAACTAAAAATATGTTGGAATAAT 485
Portiera TV pheA ATTATGGGGTGTACCAAGTAGAAAAATCAACAGAGGCGATAGTAATAACTTTTGATTCAATTATTAGTCAAACTAAAAATATGTTGGAATAAT 485

Portiera BT-B1 pheA ATTATCTATACATCATCATTTGTTGATTGATAACAGAAATATAAATAAATACATAGACAAGATTATTGCGCATCAACCATCATTTCTCAGTGTAGAGAT 585
Portiera BT-B2 pheA ATTATCTATACATCATCATTTGTTGATTGATAACAGAAATATAAATAAATACATAGACAAGATTATTGCGCATCAACCATCATTTCTCAGTGTAGAGAT 585
Portiera BT-Q1 pheA ATTATCTATACATCATCATTTGTTGATTGATAACAGAAATATAAATAAATACATAGACAAGATTATTGCGCATCAACCATCATTTCTCAGTGTAGAGAT 585
Portiera BT-Q2 pheA ATTATCTATACATCATCATTTGTTGATTGATAACAGAAATATAAATAAATACATAGACAAGATTATTGCGCATCAACCATCATTTCTCAGTGTAGAGAT 585
Portiera TV pheA ATTATCTATACATCATCATTTGTTGATTGATAACAGAAATATAAATAAATACATAGACAAGATTATTGCGCATCAACCATCATTTCTCAGTGTAGAGAT 585

Portiera BT-B1 pheA GGTTGAAAAATAACTATCCAAATGCAAAAAAATTCGAGTGGCTCTAATGCGAGAAGCTTCAAAATTAACACAATATAAAAAAATAGTGGGGCAATTG 685
Portiera BT-B2 pheA GGTTGAAAAATAACTATCCAAATGCAAAAAAATTCGAGTGGCTCTAATGCGAGAAGCTTCAAAATTAACACAATATAAAAAAATAGTGGGGCAATTG 685
Portiera BT-Q1 pheA GGTTGAAAAATAACTATCCAAATGCAAAAAAATTCGAGTGGCTCTAATGCGAGAAGCTTCAAAATTAACACAATATAAAAAAATAGTGGGGCAATTG 685
Portiera BT-Q2 pheA GGTTGAAAAATAACTATCCAAATGCAAAAAAATTCGAGTGGCTCTAATGCGAGAAGCTTCAAAATTAACACAATATAAAAAAATAGTGGGGCAATTG 685
Portiera TV pheA GGTTGAAAAATAACTATCCAAATGCAAAAAAATTCGAGTGGCTCTAATGCGAGAAGCTTCAAAATTAACACAATATAAAAAAATAGTGGGGCAATTG 685

Portiera BT-B1 pheA GTGGAGATCTGCTGCTAGTATTATCTTTAAATAACTTGCTAAAAATATAGAAGATCGTATAAATAATATACAGAGTTTAAATATTGCTGATAA 785
Portiera BT-B2 pheA GTGGAGATCTGCTGCTAGTATTATCTTTAAATAACTTGCTAAAAATATAGAAGATCGTATAAATAATATACAGAGTTTAAATATTGCTGATAA 785
Portiera BT-Q1 pheA GTGGAGATCTGCTGCTAGTATTATCTTTAAATAACTTGCTAAAAATATAGAAGATCGTATAAATAATATACAGAGTTTAAATATTGCTGATAA 785
Portiera BT-Q2 pheA GTGGAGATCTGCTGCTAGTATTATCTTTAAATAACTTGCTAAAAATATAGAAGATCGTATAAATAATATACAGAGTTTAAATATTGCTGATAA 785
Portiera TV pheA GTGGAGATCTGCTGCTAGTATTATCTTTAAATAACTTGCTAAAAATATAGAAGATCGTATAAATAATATACAGAGTTTAAATATTGCTGATAA 785

Portiera BT-B1 pheA AGATGTTGCCACCAACAGGTATGATAGAGCTTATTGATGATATATATAAACAATCAATAGGTTCTTTTATTGTTAATAGAACCCCTTTATCGTTAT 885
Portiera BT-B2 pheA AGATGTTGCCACCAACAGGTATGATAGAGCTTATTGATGATATATATAAACAATCAATAGGTTCTTTTATTGTTAATAGAACCCCTTTATCGTTAT 885
Portiera BT-Q1 pheA AGATGTTGCCACCAACAGGTATGATAGAGCTTATTGATGATATATATAAACAATCAATAGGTTCTTTTATTGTTAATAGAACCCCTTTATCGTTAT 885
Portiera BT-Q2 pheA AGATGTTGCCACCAACAGGTATGATAGAGCTTATTGATGATATATATAAACAATCAATAGGTTCTTTTATTGTTAATAGAACCCCTTTATCGTTAT 885
Portiera TV pheA AGATGTTGCCACCAACAGGTATGATAGAGCTTATTGATGATATATATAAACAATCAATAGGTTCTTTTATTGTTAATAGAACCCCTTTATCGTTAT 885

Portiera BT-B1 pheA ACATATAATCTTACGCTTAACAACTAGACCTGCACCAGAGATAAAGGAGTTGGAACATACATAATTTTGTAGAATAAAGGACATCGTAATCTA 985
Portiera BT-B2 pheA ACATATAATCTTACGCTTAACAACTAGACCTGCACCAGAGATAAAGGAGTTGGAACATACATAATTTTGTAGAATAAAGGACATCGTAATCTA 985
Portiera BT-Q1 pheA ACATATAATCTTACGCTTAACAACTAGACCTGCACCAGAGATAAAGGAGTTGGAACATACATAATTTTGTAGAATAAAGGACATCGTAATCTA 985
Portiera BT-Q2 pheA ACATATAATCTTACGCTTAACAACTAGACCTGCACCAGAGATAAAGGAGTTGGAACATACATAATTTTGTAGAATAAAGGACATCGTAATCTA 985
Portiera TV pheA ACATATAATCTTACGCTTAACAACTAGACCTGCACCAGAGATAAAGGAGTTGGAACATACATAATTTTGTAGAATAAAGGACATCGTAATCTA 985

Portiera BT-B1 pheA AATTGTTAGATAAATAGTATACAACTAGACCTGCACCAGAGATAAAGGAGTTGGAACATACATAATTTTGTAGAATAAAGGACATCGTAATCTA 1080
Portiera BT-B2 pheA AATTGTTAGATAAATAGTATACAACTAGACCTGCACCAGAGATAAAGGAGTTGGAACATACATAATTTTGTAGAATAAAGGACATCGTAATCTA 1080
Portiera BT-Q1 pheA AATTGTTAGATAAATAGTATACAACTAGACCTGCACCAGAGATAAAGGAGTTGGAACATACATAATTTTGTAGAATAAAGGACATCGTAATCTA 1080
Portiera BT-Q2 pheA AATTGTTAGATAAATAGTATACAACTAGACCTGCACCAGAGATAAAGGAGTTGGAACATACATAATTTTGTAGAATAAAGGACATCGTAATCTA 1080
Portiera TV pheA AATTGTTAGATAAATAGTATACAACTAGACCTGCACCAGAGATAAAGGAGTTGGAACATACATAATTTTGTAGAATAAAGGACATCGTAATCTA 1080
```

(2)

```
Portiera BT-B1 pheA NKKKPKYIKYIGNIDYQILKLSIRN-----AKLVSGIQ--LADDQKNCYNNGHEDRYFYSIKTSNKGPLSNKVLKIFKSIYSACLKFKKKSQVAYLGP 95
Portiera BT-B2 pheA NKKKPKYIKYIGNIDYQILKLSIRN-----AKLVSGIQ--LADDQKNCYNNGHEDRYFYSIKTSNKGPLSNKVLKIFKSIYSACLKFKKKSQVAYLGP 95
Portiera BT-Q1 pheA NKKKPKYIKYIGNIDYQILKLSIRN-----AKLVSGIQ--LADDQKNCYNNGHEDRYFYSIKTSNKGPLSNKVLKIFKSIYSACLKFKKKSQVAYLGP 95
Portiera BT-Q2 pheA NKKKPKYIKYIGNIDYQILKLSIRN-----AKLVSGIQ--LADDQKNCYNNGHEDRYFYSIKTSNKGPLSNKVLKIFKSIYSACLKFKKKSQVAYLGP 95
Portiera TV pheA NKKKPKYIKYIGNIDYQILKLSIRN-----AKLVSGIQ--LADDQKNCYNNGHEDRYFYSIKTSNKGPLSNKVLKIFKSIYSACLKFKKKSQVAYLGP 95

Portiera BT-B1 pheA SFTTQAVLRKFKSIRSIKPVQVFRTEIKNIYNGVVPENSTEGIVNNTDPSFISNNLKICGEIILSIHHLLIDQNKINIKDIYSHQQSFQSCQR 195
Portiera BT-B2 pheA SFTTQAVLRKFKSIRSIKPVQVFRTEIKNIYNGVVPENSTEGIVNNTDPSFISNNLKICGEIILSIHHLLIDQNKINIKDIYSHQQSFQSCQR 195
Portiera BT-Q1 pheA SFTTQAVLRKFKSIRSIKPVQVFRTEIKNIYNGVVPENSTEGIVNNTDPSFISNNLKICGEIILSIHHLLIDQNKINIKDIYSHQQSFQSCQR 195
Portiera BT-Q2 pheA SFTTQAVLRKFKSIRSIKPVQVFRTEIKNIYNGVVPENSTEGIVNNTDPSFISNNLKICGEIILSIHHLLIDQNKINIKDIYSHQQSFQSCQR 195
Portiera TV pheA SFTTQAVLRKFKSIRSIKPVQVFRTEIKNIYNGVVPENSTEGIVNNTDPSFISNNLKICGEIILSIHHLLIDQNKINIKDIYSHQQSFQSCQR 195

Portiera BT-B1 pheA KLNKINPNAKKIVASNAEASNLTYKKNSAIAAGDLAASYSLIKLAKNIEDRINNYTRFLILSDKOVAPTGYDKTYLMIYINNIGISFYLLIEPFYR 295
Portiera BT-B2 pheA KLNKINPNAKKIVASNAEASNLTYKKNSAIAAGDLAASYSLIKLAKNIEDRINNYTRFLILSDKOVAPTGYDKTYLMIYINNIGISFYLLIEPFYR 295
Portiera BT-Q1 pheA KLNKINPNAKKIVASNAEASNLTYKKNSAIAAGDLAASYSLIKLAKNIEDRINNYTRFLILSDKOVAPTGYDKTYLMIYINNIGISFYLLIEPFYR 295
Portiera BT-Q2 pheA KLNKINPNAKKIVASNAEASNLTYKKNSAIAAGDLAASYSLIKLAKNIEDRINNYTRFLILSDKOVAPTGYDKTYLMIYINNIGISFYLLIEPFYR 295
Portiera TV pheA KLNKINPNAKKIVASNAEASNLTYKKNSAIAAGDLAASYSLIKLAKNIEDRINNYTRFLILSDKOVAPTGYDKTYLMIYINNIGISFYLLIEPFYR 295

Portiera BT-B1 pheA NNILRLTRPAPENKGVNNYIFLEIKGHRKSKLVEKTEELIYLRGAELKILGSFPEQLTKR 359
Portiera BT-B2 pheA NNILRLTRPAPENKGVNNYIFLEIKGHRKSKLVEKTEELIYLRGAELKILGSFPEQLTKR 359
Portiera BT-Q1 pheA NNILRLTRPAPENKGVNNYIFLEIKGHRKSKLVEKTEELIYLRGAELKILGSFPEQLTKR 359
Portiera BT-Q2 pheA NNILRLTRPAPENKGVNNYIFLEIKGHRKSKLVEKTEELIYLRGAELKILGSFPEQLTKR 359
Portiera TV pheA NNILRLTRPAPENKGVNNYIFLEIKGHRKSKLVEKTEELIYLRGAELKILGSFPEQLTKR 359
```

(1)

|                     |                         |     |
|---------------------|-------------------------|-----|
| Portiera BT-B1 ilvA | DKLGFRYWNESKNVAYKMFNLQN | 523 |
| Portiera BT-B2 ilvA | DKLGFRYWNESKNVAYKMFNLQN | 523 |
| Portiera BT-Q1 ilvA | DKLGFRYWNESKNVAYKMFNLQN | 523 |
| Portiera BT-Q2 ilvA | DKLGFRYWNESKNVAYKMFNLQN | 523 |
| Portiera TV ilvA    | DKLGFRYWNESKNVAYKMFNLQN | 518 |
